# Supplementary material
Source: PubMed Central journal article supplement (PMC3575131)
Supplement: NIHMS441034-supplement-1_si_001.pdf [file NIHMS441034-supplement-1_si_001.pdf]

## Supporting information

### **Cyanide Antidotes for Mass Casualties: Water-Soluble Salts of the Dithiane (Sulfanegen) from 3-Mercaptopyruvate for Intramuscular Administration**

Steven E. Patterson,<sup>\*†</sup> Alexandre R. Monteil,<sup>†</sup> Jonathan F. Cohen,<sup>†</sup> Daune L. Crankshaw,<sup>†‡</sup> Robert Vince<sup>†</sup> and Herbert T. Nagasawa.<sup>†</sup>

<sup>†</sup>Center for Drug Design, Academic Health Center, University of Minnesota, Minneapolis, MN 55455, and

<sup>‡</sup>Medical Research Laboratories, DVA Medical Center, Minneapolis, MN 55417.

Experimental procedures

|                                                                 |         |
|-----------------------------------------------------------------|---------|
| Animals.....                                                    | S3      |
| Statistical analyses.....                                       | S3      |
| Mouse Model.....                                                | S3      |
| Chemistry.....                                                  | S3      |
| Procedure for preparation of compound <b>6</b> .....            | S3      |
| Procedure for preparation of compounds <b>7a-f</b> .....        | S4      |
| Characterization and yield of compounds <b>6, 7a-f</b> .....    | S4-37   |
| X-Ray crystallographic report for <b>7d</b> .....               | S5-S18  |
| X-Ray crystallographic report for <b>7e</b> .....               | S19-S36 |
| NMR spectra for compounds <b>6, 7a-f</b> .....                  | S37-S51 |
| NMR studies of <b>2</b> , including representative spectra..... | S52-S59 |
| Figures and Schemes.....                                        | S60     |

## Animals

Male ND-4 Swiss-Webster mice weighing 25-34 g were purchased from Harlan Labs, Indianapolis, IN. These mice were group housed in 17in x 10in x 8in polycarbonate cages and allowed ad lib access to Harlan Teklad #8604 rodent chow (Madison, WI) and water. The cages containing 8 mice per cage were placed in a temperature-controlled animal facilities barrier room (21-22 °C) with 12:12, L:D photoperiods (lights on at 0700). A week of adaptation was allowed in this new environment before experiments commenced. Experiments were approved and conducted in accordance with guidelines of the University of Minnesota and Department of Veterans Affairs Medical Center IACUC committees.

## Statistical analysis

Data was analyzed by a one-factor ANOVA with Scheffe post hoc for comparison of treatment means. Data was represented as values  $\pm$  S.E. with a p-value of <0.05 considered statistically significant. A simple regression determined dose-response relationships.

## Mouse Model

The righting reflex recovery paradigm of Crankshaw et al, [Tox. Letters 175(2007) 111-117] was used in the mouse studies. Briefly the test is as follows: Mice are pretreated with a dose of sodium cyanide (4.8 mg/kg) intraperitoneally (i.p.) which induces a state of immobility for approximately 1 h. The animal is tested for recovery of righting reflex by placement on top of a suspended screen. The screen is then inverted and the mouse given 1 min to climb over on to the screen's upper surface. The endpoint is reached when the mouse reaches the screen's upper surface.

## Chemistry

General Methods.

<sup>1</sup>H and <sup>13</sup>C NMR spectra were obtained on a Varian 600 MHz spectrometer in the Center for Drug Design, University of Minnesota, Minneapolis, MN, except for the time studies which were performed on a Varian 200 MHz spectrometer. All chemical shifts are referenced to residual undeuterated solvent. Data of proton spectra are reported as follows: chemical shift (multiplicity [singlet (s), doublet (d), triplet (t), quartet (q) and multiplet (m)], coupling constants [Hz], and integration). Carbon spectra (150 MHz) were recorded with complete proton decoupling and the chemical shifts are reported in ppm (C) relative to solvent resonance as internal standard except those in D<sub>2</sub>O where C<sub>6</sub>D<sub>6</sub> or CD<sub>3</sub>OD contained inside a coaxial insert was referenced as an external standard. X-Ray structure determinations were performed by Victor G. Young, Jr. of the X-Ray Crystallographic Laboratory, University of Minnesota, Minneapolis, MN. Mass spectra were recorded on an Agilent G1960-6090 TOF mass spectrometer. Compound purity at 95% or greater was determined by microanalyses performed by Atlantic Microlab, Inc., Atlanta, GA, or by MHW Laboratories, Phoenix AZ. Unless stated otherwise, all the reagents were purchased from commercial sources and used without additional purification.

**Procedure for the preparation of 2,5-dihydroxy-1,4-dithiane-2,5-dicarboxylic acid (6).** A solution of disodium 2,5-dihydroxy-1,4-dithiane-2,5-dicarboxylic acid tetrahydrate (0.25 g, 0.70 mmol) in H<sub>2</sub>O (2.5 mL) was applied to a column of ion-exchange resin Dowex 50WX8-200 (H<sup>+</sup>;

4 mL, 7 meq), and was eluted with H<sub>2</sub>O until the eluate tested negative for the presence of dithiane by KMnO<sub>4</sub> stain on TLC silica plate. The resulting solution was then lyophilized to yield a white solid.

### **Procedure for Preparation of salts 7a, c-f**

Sulfanegen salts **7a**, **7c-7f** were prepared by addition of a 1.0 M solution of the desired amine (2 equiv.) in H<sub>2</sub>O to the solution obtained immediately upon eluting 2,5-dihydroxy-1,4-dithiane-2,5-dicarboxylic acid (**6**), followed by lyophilization to constant weight to yield white solids.

### **Procedure for preparation of 2,5-Dihydroxy-1,4-dithiane-2,5-dicarboxylic acid, bis-((3R,4R,5S)-3-Amino-6-(hydroxymethyl)-oxane-2,4,5-triol) sesquihydrate salt (7b).**

Compound **7b** was prepared by elution of a solution of glucosamine hydrochloride (2 equiv.) through a column of ion-exchange resin Dowex 1X8-200 (HCO<sub>3</sub><sup>-</sup>; 10 equiv.) and immediately into the solution of 2,5-dihydroxy-1,4-dithiane-2,5-dicarboxylic acid until the eluate tested negative for the presence of glucosamine by KMnO<sub>4</sub> stain on TLC silica plate. The resulting solution was lyophilized to constant weight to yield a white solid.

### **Characterization of compounds 6, 7a-f**

**2,5-dihydroxy-1,4-dithiane-2,5-dicarboxylic acid (6).** Yield 99%. <sup>1</sup>H NMR (600 MHz, D<sub>2</sub>O): δ 2.94 (s, monomer), 3.02 (2H, d, *J* = 14.4 Hz, major isomer), 3.22 (2H, d, *J* = 14.4 Hz, minor isomer), 3.64 (2H, d, *J* = 14.4 Hz, minor isomer), 3.91 (2H, d, *J* = 14.4 Hz). <sup>13</sup>C NMR (150 MHz, CD<sub>3</sub>OD as external reference): δ 35.5, 76.3, 175.0. Anal. Calcd for C<sub>6</sub>H<sub>8</sub>O<sub>6</sub>S<sub>2</sub>: C, 30.00; H, 3.36; S, 26.69. Found: C, 30.12; H, 3.44; S, 26.48.

**2,5-Dihydroxy-1,4-dithiane-2,5-dicarboxylic acid, bis-((2R,3R,4R,5S)-6-methylaminohexane-1,2,3,4,5-pentol) dihydrate salt (7a).** Yield 99%. <sup>1</sup>H NMR (600 MHz, D<sub>2</sub>O): δ 2.80 (6H, s), 2.87 (2H, d, *J* = 14.4 Hz, major isomer), 3.11 (2H, d, *J* = 14.4 Hz, minor isomer), 3.19-3.28 (4H, m), 3.58 (2H, d, *J* = 14.4 Hz, minor isomer), 3.67-3.70 (4H, m), 3.77-3.80 (2H, m), 3.83-3.86 (4H, m), 3.88 (2H, d, *J* = 14.4 Hz, major isomer), 4.12-4.15 (2H, m). <sup>13</sup>C NMR (150 MHz, C<sub>6</sub>D<sub>6</sub> as external reference): δ 33.7, 36.7, 51.8, 63.4, 68.8, 71.2, 71.4, 71.6, 77.8, 177.6. Anal. Calcd for C<sub>20</sub>H<sub>42</sub>N<sub>2</sub>O<sub>16</sub>S<sub>2</sub>·2H<sub>2</sub>O: C, 36.03; H, 6.95; N, 4.20; S, 9.62. Found: C, 35.82; H, 6.96; N, 4.27; S, 9.58. mp: 119-120 °C (dec.).

**2,5-Dihydroxy-1,4-dithiane-2,5-dicarboxylic acid, bis-((3R,4R,5S)-3-Amino-6-(hydroxymethyl)-oxane-2,4,5-triol) sesquihydrate salt (7b).** Yield 99%. <sup>1</sup>H NMR (600 MHz, D<sub>2</sub>O): δ 2.87 (2H, d, *J* = 14.4 Hz, major isomer), 3.03 (1H, m), 3.11 (2H, d, *J* = 14.4 Hz, minor isomer), 3.33 (1H, m), 3.48-3.55 (3H, m), 3.59 (2H, d, *J* = 14.4 Hz, minor isomer), 3.71 (1H, m), 3.78-3.82 (2H, m), 3.85 (2H, d, *J* = 14.4 Hz, major isomer), 3.89-3.95 (4H, m), 4.96 (1H, d, *J* = 7.8 Hz), 5.47 (1H, d, *J* = 3.0 Hz). <sup>13</sup>C NMR (150 MHz, C<sub>6</sub>D<sub>6</sub> as external reference): δ 36.6, 55.0, 57.4, 61.1, 70.4, 72.3, 72.7, 73.5, 76.9, 77.8, 85.0, 89.9, 93.5, 174.7, 177.6. Anal. Calcd for C<sub>18</sub>H<sub>34</sub>N<sub>2</sub>O<sub>16</sub>S<sub>2</sub>·1.5H<sub>2</sub>O: C, 34.56; H, 5.96; N, 4.48; S, 10.25. Found: C, 34.50; H, 6.00; N, 4.39; S, 10.25. mp: 126-128 °C.

**2,5-Dihydroxy-1,4-dithiane-2,5-dicarboxylic acid, bis-(2-aminoethanol) dodranhydrate salt (7c).** Yield 99%. <sup>1</sup>H NMR (600 MHz, D<sub>2</sub>O): δ 2.87 (2H, d, *J* = 14.4 Hz, major isomer), 3.16 (2H, d, *J* = 14.4 Hz, minor isomer), 3.16 (4H, t, *J* = 5.4 Hz), 3.58 (2H, d, *J* = 14.4 Hz, minor isomer),

3.85 (4H, t,  $J = 5.4$  Hz), 3.88 (2H, d,  $J = 14.4$  Hz, minor isomer).  $^{13}\text{C}$  NMR (150 MHz,  $\text{C}_6\text{D}_6$  as external reference):  $\delta$  36.7, 42.0, 58.3, 77.8, 187.1. Anal. Calcd for  $\text{C}_{10}\text{H}_{22}\text{N}_2\text{O}_7\text{S}_2 \cdot \frac{3}{4} \text{H}_2\text{O}$ : C, 31.95; H, 6.30; N, 7.45; S, 17.06. Found: C, 31.95; H, 6.24; N, 7.38; S, 17.23. mp: 73-75 °C.

**2,5-Dihydroxy-1,4-dithiane-2,5-dicarboxylic acid, bis-(2,2'-iminodiethanol) salt (7d).** Yield 99%.  $^1\text{H}$  NMR (600 MHz,  $\text{D}_2\text{O}$ ):  $\delta$  2.85 (2H, d,  $J = 14.4$  Hz, major isomer), 3.10 (2H, d,  $J = 14.4$  Hz, minor isomer), 3.28 (8H, t,  $J = 5.4$  Hz), 3.59 (2H, d,  $J = 14.4$  Hz, minor isomer), 3.88 (2H, d,  $J = 14.4$  Hz, minor isomer), 3.90 (8H, t,  $J = 5.4$  Hz).  $^{13}\text{C}$  NMR (150 MHz,  $\text{C}_6\text{D}_6$  as external reference):  $\delta$  36.7, 49.6, 57.2, 77.8, 177.6. Anal. Calcd for  $\text{C}_{10}\text{H}_{30}\text{N}_2\text{O}_{10}\text{S}_2$ : C, 37.32; H, 6.71; N, 6.22; S, 14.23. Found: C, 37.53; H, 6.77; N, 6.24; S, 14.18. Elucidation of structure via X-Ray crystallography. Crystals were grown from MeOH/Et<sub>2</sub>O. mp: 104-105 °C.

**2,5-Dihydroxy-1,4-dithiane-2,5-dicarboxylic acid, bis-(2,2',2''-nitrilotriethanol) salt (7e).** Yield 99%.  $^1\text{H}$  NMR (600 MHz,  $\text{D}_2\text{O}$ ):  $\delta$  2.86 (2H, d,  $J = 14.4$  Hz, major isomer), 3.09 (2H, d,  $J = 14.4$  Hz, minor isomer), 3.51 (12H, t,  $J = 5.4$  Hz), 3.58 (2H, d,  $J = 14.4$  Hz, minor isomer), 3.87 (2H, d,  $J = 14.4$  Hz), 3.98 (12H, t,  $J = 5.4$  Hz).  $^{13}\text{C}$  NMR (150 MHz,  $\text{CD}_3\text{OD}$  as external reference):  $\delta$  36.8, 55.9, 56.2, 77.9, 177.7. Anal. Calcd for  $\text{C}_{18}\text{H}_{38}\text{N}_2\text{O}_{12}\text{S}_2$ : C, 40.14; H, 7.11; N, 5.20; S, 11.91. Found: C, 39.84; H, 7.18; N, 5.32; S, 11.63. Elucidation of structure via X-Ray crystallography. Crystals were grown from THF/acetone. Mp: 122-123 °C.

**2,5-Dihydroxy-1,4-dithiane-2,5-dicarboxylic acid, bis-(2-amino-2-hydroxymethyl-propane-1,3-diol) salt (7f).** Yield 99%.  $^1\text{H}$  NMR (600 MHz,  $\text{D}_2\text{O}$ ):  $\delta$  2.86 (2H, d,  $J = 14.4$  Hz, major isomer), 3.10 (2H, d,  $J = 14.4$  Hz, minor isomer), 3.58 (2H, d,  $J = 14.4$  Hz, minor isomer), 3.75 (12H, s), 3.87 (2H, d,  $J = 14.4$  Hz).  $^{13}\text{C}$  NMR (150 MHz,  $\text{CD}_3\text{OD}$  as external reference):  $\delta$  36.8, 60.2, 62.3, 77.9, 177.8. Anal. Calcd for  $\text{C}_{14}\text{H}_{30}\text{N}_2\text{O}_{12}\text{S}_2$ : C, 34.85; H, 6.27; N, 5.81; S, 13.29. Found: C, 34.74; H, 6.40; N, 5.73; S, 13.21. mp: 125-127 °C.

## References

(1) Nagasawa, H. T.; Goon, D. J. W.; Crankshaw, D. L.; Vince, R.; Patterson, S. E. Novel, orally effective cyanide antidotes. *J. Med. Chem.* **2007**, *50*, 6462-6464.

## 2,5-Dihydroxy-1,4-dithiane-2,5-dicarboxylic acid, bis-(2,2'-iminodiethanol) salt (7d).CRYSTAL STRUCTURE REPORT

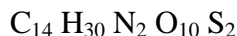

or

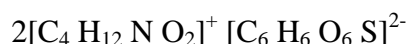

Report prepared for:

A. Monteil / Prof. S. Patterson

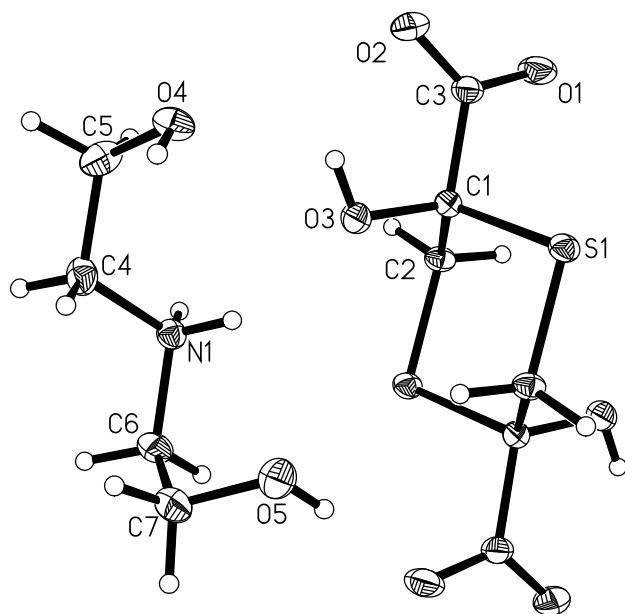

Victor G. Young, Jr.

X-Ray Crystallographic Laboratory

Department of Chemistry

University of Minnesota

207 Pleasant St. S.E.

Minneapolis, MN 55455

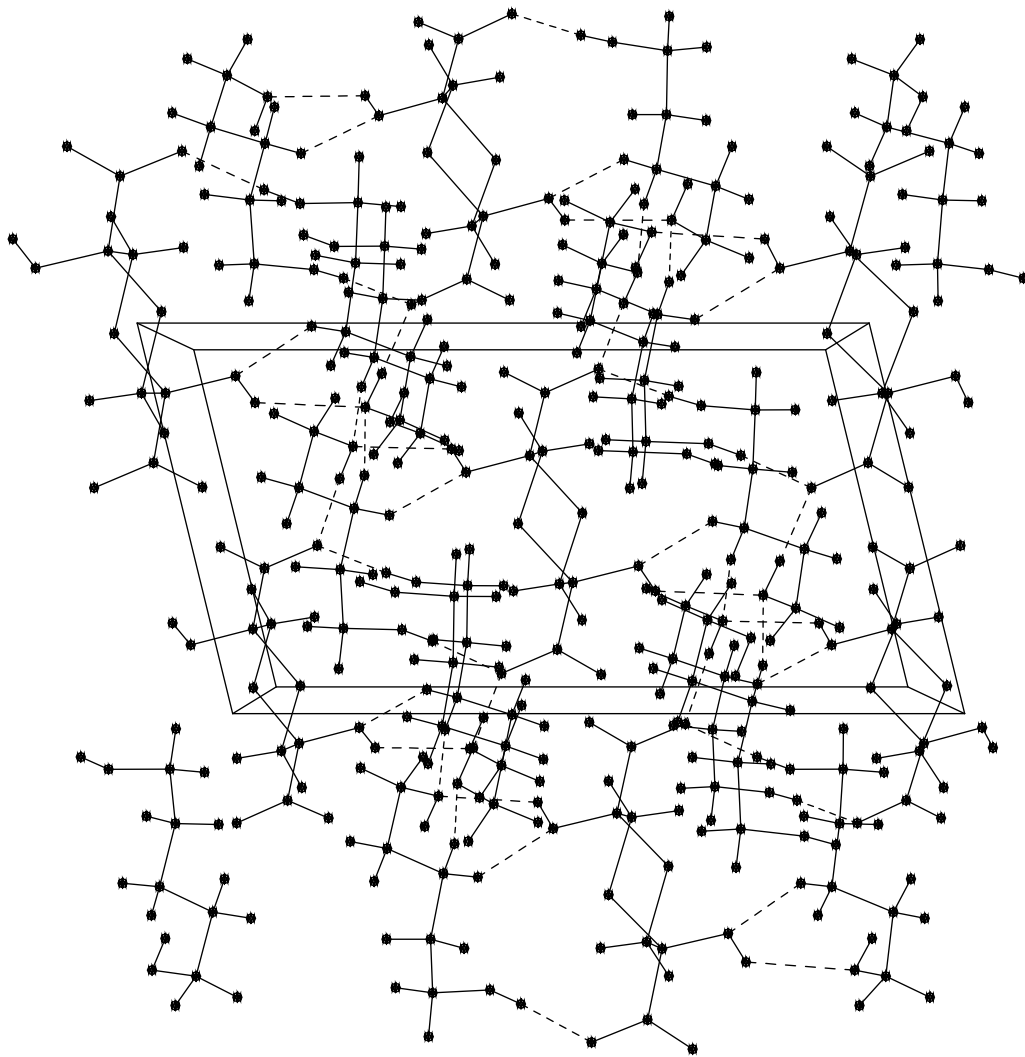

## Data collection

A crystal (approximate dimensions 0.34x 0.20 x 0.18mm<sup>3</sup>) was placed onto the tip of a 0.1 mm diameter glass capillary and mounted on a CCD area detector diffractometer for a data collection at 173(2) K.<sup>1</sup> A preliminary set of cell constants was calculated from reflections harvested from three sets of 20 frames. These initial sets of frames were oriented such that orthogonal wedges of reciprocal space were surveyed. This produced initial orientation matrices determined from 58 reflections. The data collection was carried out using MoK $\alpha$  radiation (graphite monochromator) with a frame time of 45 seconds and a detector distance of 4.8 cm. A randomly oriented region of reciprocal space was surveyed to the extent of one hemisphere and to a resolution of 0.77 Å. Four major sections of frames were collected with 0.30° steps in  $\omega$  at four different  $\phi$  settings and a detector position of -28° in  $2\theta$ . The intensity data were corrected for absorption and decay (SADABS).<sup>2</sup> Final cell constants were calculated from 2978 strong reflections from the actual data collection after integration (SAINT).<sup>3</sup> Please refer to Table 1 for additional crystal and refinement information.

## Structure solution and refinement

The structure was solved using Bruker SHELXTL<sup>4</sup> and refined using Bruker SHELXTL.<sup>4</sup> The space group P2<sub>1</sub>/n was determined based on systematic absences and intensity statistics. A direct-methods solution was calculated which provided most non-hydrogen atoms from the E-map. Full-matrix least squares / difference Fourier cycles were performed which located the remaining non-hydrogen atoms. All non-hydrogen atoms were refined with anisotropic displacement parameters. All hydrogen atoms were placed in ideal positions and refined as riding atoms with relative isotropic displacement parameters. The final full matrix least squares refinement converged to  $R1 = 0.0338$  and  $wR2 = 0.0896$  ( $F^2$ , obs. data).

## Structure description

The structure is the one suggested, except for the charges of the resultant cation and dianion. The acid groups lose protons to the amine groups to form a classical organic salt. The dianion lies on a crystallographic inversion center so ½ of this group is unique. Included in the asymmetric unit is one diethanolamine cation. The five protons are involved in unique hydrogen bonds.



Data collection and structure solution were conducted at the X-Ray Crystallographic Laboratory, 192 Kolthoff Hall, Department of Chemistry, University of Minnesota. All calculations were performed using Pentium computers using the current SHELXTL suite of programs.

---

- <sup>1</sup> SMART V5.054, Bruker Analytical X-ray Systems, Madison, WI (2001).
- <sup>2</sup> An empirical correction for absorption anisotropy, R. Blessing, *Acta Cryst.* **A51**, 33-38(1995).
- <sup>3</sup> SAINT+ V7.34A, Bruker Analytical X-Ray Systems, Madison, WI (2003).
- <sup>4</sup> SHELXTL V6.14, Bruker Analytical X-Ray Systems, Madison, WI (2000).

Some equations of interest:

$$R_{\text{int}} = \Sigma |F_o^2 - \langle F_o^2 \rangle| / \Sigma |F_o^2|$$

$$R_1 = \Sigma ||F_o| - |F_c|| / \Sigma |F_o|$$

$$wR2 = [\Sigma [w(F_o^2 - F_c^2)^2] / \Sigma [w(F_o^2)^2]]^{1/2}$$

where  $w = q / [\sigma^2(F_o^2) + (a^*P)^2 + b^*P + d + e^*\sin(\theta)]$

$$\text{GooF} = S = [\Sigma [w(F_o^2 - F_c^2)^2] / (n-p)]^{1/2}$$

Table 1. Crystal data and structure refinement for 09192a.

---

|                                 |                                                                               |                            |
|---------------------------------|-------------------------------------------------------------------------------|----------------------------|
| Identification code             | 09192a                                                                        |                            |
| Empirical formula               | C <sub>14</sub> H <sub>30</sub> N <sub>2</sub> O <sub>10</sub> S <sub>2</sub> |                            |
| Formula weight                  | 450.52                                                                        |                            |
| Temperature                     | 173(2) K                                                                      |                            |
| Wavelength                      | 0.71073 Å                                                                     |                            |
| Crystal system                  | Monoclinic                                                                    |                            |
| Space group                     | P2 <sub>1</sub> /n                                                            |                            |
| Unit cell dimensions            | $a = 7.7641(8) \text{ \AA}$                                                   | $\alpha = 90^\circ$        |
|                                 | $b = 9.542(1) \text{ \AA}$                                                    | $\beta = 103.727(1)^\circ$ |
|                                 | $c = 14.1303(14) \text{ \AA}$                                                 | $\gamma = 90^\circ$        |
| Volume                          | 1016.94(18) Å <sup>3</sup>                                                    |                            |
| Z                               | 2                                                                             |                            |
| Density (calculated)            | 1.471 Mg/m <sup>3</sup>                                                       |                            |
| Absorption coefficient          | 0.316 mm <sup>-1</sup>                                                        |                            |
| $F(000)$                        | 480                                                                           |                            |
| Crystal color, morphology       | Colorless, Prism                                                              |                            |
| Crystal size                    | 0.34 x 0.20 x 0.18 mm <sup>3</sup>                                            |                            |
| Theta range for data collection | 2.60 to 27.50°                                                                |                            |
| Index ranges                    | $-10 \leq h \leq 9, 0 \leq k \leq 12, 0 \leq l \leq 18$                       |                            |
| Reflections collected           | 7216                                                                          |                            |
| Independent reflections         | 2316 [ $R(\text{int}) = 0.0341$ ]                                             |                            |

|                                        |                                       |
|----------------------------------------|---------------------------------------|
| Observed reflections                   | 1925                                  |
| Completeness to $\theta = 27.50^\circ$ | 99.3%                                 |
| Absorption correction                  | Multi-scan                            |
| Max. and min. transmission             | 0.9453 and 0.9001                     |
| Refinement method                      | Full-matrix least-squares on $F^2$    |
| Data / restraints / parameters         | 2316 / 0 / 130                        |
| Goodness-of-fit on $F^2$               | 1.062                                 |
| Final $R$ indices [ $I > 2\sigma(I)$ ] | $R1 = 0.0338$ , $wR2 = 0.0836$        |
| $R$ indices (all data)                 | $R1 = 0.0439$ , $wR2 = 0.0896$        |
| Largest diff. peak and hole            | 0.495 and -0.253 e. $\text{\AA}^{-3}$ |

Table 2. Atomic coordinates( $\times 10^4$ ) and equivalent isotropic displacement parameters ( $\text{\AA}^2 \times 10^3$ )

for 09192a.  $U_{\text{eq}}$  is defined as one third of the trace of the orthogonalized  $U_{ij}$  tensor.

|    | x       | y       | z       | $U_{\text{eq}}$ |
|----|---------|---------|---------|-----------------|
| S1 | 4854(1) | 6688(1) | 4507(1) | 16(1)           |
| C1 | 3248(2) | 5825(2) | 5089(1) | 14(1)           |
| C2 | 3167(2) | 4251(2) | 4885(1) | 15(1)           |
| C3 | 1455(2) | 6538(2) | 4628(1) | 18(1)           |
| O1 | 795(2)  | 6300(1) | 3736(1) | 26(1)           |
| O2 | 826(2)  | 7297(1) | 5173(1) | 24(1)           |
| O3 | 3705(2) | 6047(1) | 6102(1) | 21(1)           |
| N1 | 4735(2) | 4407(1) | 7842(1) | 16(1)           |
| C4 | 4153(2) | 5219(2) | 8617(1) | 22(1)           |
| C5 | 2559(2) | 6137(2) | 8233(1) | 24(1)           |
| O4 | 2947(2) | 7372(1) | 7754(1) | 20(1)           |
| C6 | 6390(2) | 3575(2) | 8224(1) | 22(1)           |
| C7 | 8017(2) | 4501(2) | 8431(1) | 27(1)           |
| O5 | 8098(2) | 5324(1) | 7610(1) | 24(1)           |

Table 3. Bond lengths [ $\text{\AA}$ ] and angles [ $^\circ$ ] for 09192a.

|                  |            |                   |            |
|------------------|------------|-------------------|------------|
| S(1)-C(2)#1      | 1.8096(16) | C(4)-C(5)         | 1.509(2)   |
| S(1)-C(1)        | 1.8427(15) | C(4)-H(4B)        | 0.9900     |
| C(1)-O(3)        | 1.4071(18) | C(4)-H(4C)        | 0.9900     |
| C(1)-C(2)        | 1.528(2)   | C(5)-O(4)         | 1.427(2)   |
| C(1)-C(3)        | 1.547(2)   | C(5)-H(5B)        | 0.9900     |
| C(2)-S(1)#1      | 1.8096(16) | C(5)-H(5C)        | 0.9900     |
| C(2)-H(2A)       | 0.9900     | O(4)-H(4A)        | 0.8400     |
| C(2)-H(2B)       | 0.9900     | C(6)-C(7)         | 1.512(2)   |
| C(3)-O(2)        | 1.238(2)   | C(6)-H(6A)        | 0.9900     |
| C(3)-O(1)        | 1.263(2)   | C(6)-H(6B)        | 0.9900     |
| O(3)-H(3A)       | 0.8400     | C(7)-O(5)         | 1.414(2)   |
| N(1)-C(4)        | 1.496(2)   | C(7)-H(7A)        | 0.9900     |
| N(1)-C(6)        | 1.498(2)   | C(7)-H(7B)        | 0.9900     |
| N(1)-H(1A)       | 0.9200     | O(5)-H(5A)        | 0.8400     |
| N(1)-H(1B)       | 0.9200     |                   |            |
| C(2)#1-S(1)-C(1) | 98.94(7)   | C(2)-C(1)-S(1)    | 110.91(10) |
| O(3)-C(1)-C(2)   | 109.24(12) | C(3)-C(1)-S(1)    | 104.61(10) |
| O(3)-C(1)-C(3)   | 110.30(12) | C(1)-C(2)-S(1)#1  | 113.89(11) |
| C(2)-C(1)-C(3)   | 111.10(13) | C(1)-C(2)-H(2A)   | 108.8      |
| O(3)-C(1)-S(1)   | 110.62(10) | S(1)#1-C(2)-H(2A) | 108.8      |

|                   |            |                  |            |
|-------------------|------------|------------------|------------|
| C(1)-C(2)-H(2B)   | 108.8      | C(4)-C(5)-H(5C)  | 108.8      |
| S(1)#1-C(2)-H(2B) | 108.8      | H(5B)-C(5)-H(5C) | 107.7      |
| H(2A)-C(2)-H(2B)  | 107.7      | C(5)-O(4)-H(4A)  | 109.5      |
| O(2)-C(3)-O(1)    | 126.78(15) | N(1)-C(6)-C(7)   | 111.45(14) |
| O(2)-C(3)-C(1)    | 116.30(14) | N(1)-C(6)-H(6A)  | 109.3      |
| O(1)-C(3)-C(1)    | 116.92(13) | C(7)-C(6)-H(6A)  | 109.3      |
| C(1)-O(3)-H(3A)   | 109.5      | N(1)-C(6)-H(6B)  | 109.3      |
| C(4)-N(1)-C(6)    | 113.15(13) | C(7)-C(6)-H(6B)  | 109.3      |
| C(4)-N(1)-H(1A)   | 108.9      | H(6A)-C(6)-H(6B) | 108.0      |
| C(6)-N(1)-H(1A)   | 108.9      | O(5)-C(7)-C(6)   | 111.34(14) |
| C(4)-N(1)-H(1B)   | 108.9      | O(5)-C(7)-H(7A)  | 109.4      |
| C(6)-N(1)-H(1B)   | 108.9      | C(6)-C(7)-H(7A)  | 109.4      |
| H(1A)-N(1)-H(1B)  | 107.8      | O(5)-C(7)-H(7B)  | 109.4      |
| N(1)-C(4)-C(5)    | 113.70(14) | C(6)-C(7)-H(7B)  | 109.4      |
| N(1)-C(4)-H(4B)   | 108.8      | H(7A)-C(7)-H(7B) | 108.0      |
| C(5)-C(4)-H(4B)   | 108.8      | C(7)-O(5)-H(5A)  | 109.5      |
| N(1)-C(4)-H(4C)   | 108.8      |                  |            |
| C(5)-C(4)-H(4C)   | 108.8      |                  |            |
| H(4B)-C(4)-H(4C)  | 107.7      |                  |            |
| O(4)-C(5)-C(4)    | 113.73(14) |                  |            |
| O(4)-C(5)-H(5B)   | 108.8      |                  |            |
| C(4)-C(5)-H(5B)   | 108.8      |                  |            |
| O(4)-C(5)-H(5C)   | 108.8      |                  |            |

---

Symmetry transformations used to generate equivalent atoms:

#1  $-x+1,-y+1,-z+1$

Table 4. Anisotropic displacement parameters ( $\text{\AA}^2 \times 10^3$ ) for 09192a. The anisotropic displacement factor exponent takes the form:  $-2\pi^2 [h^2 a^{*2} U_{11} + \dots + 2 h k a^* b^* U_{12}]$

|    | $U_{11}$ | $U_{22}$ | $U_{33}$ | $U_{23}$ | $U_{13}$ | $U_{12}$ |
|----|----------|----------|----------|----------|----------|----------|
| S1 | 16(1)    | 13(1)    | 19(1)    | 3(1)     | 4(1)     | 1(1)     |
| C1 | 15(1)    | 15(1)    | 13(1)    | 1(1)     | 3(1)     | 2(1)     |
| C2 | 12(1)    | 14(1)    | 19(1)    | 1(1)     | 1(1)     | -1(1)    |
| C3 | 14(1)    | 17(1)    | 22(1)    | 4(1)     | 4(1)     | 2(1)     |
| O1 | 20(1)    | 34(1)    | 20(1)    | -2(1)    | -1(1)    | 11(1)    |
| O2 | 22(1)    | 25(1)    | 26(1)    | 0(1)     | 8(1)     | 9(1)     |
| O3 | 25(1)    | 23(1)    | 14(1)    | -1(1)    | 5(1)     | 9(1)     |
| N1 | 17(1)    | 13(1)    | 16(1)    | 0(1)     | 3(1)     | -1(1)    |
| C4 | 32(1)    | 17(1)    | 17(1)    | 0(1)     | 7(1)     | 3(1)     |
| C5 | 22(1)    | 19(1)    | 35(1)    | -1(1)    | 13(1)    | 0(1)     |
| O4 | 18(1)    | 16(1)    | 23(1)    | -2(1)    | -2(1)    | 0(1)     |
| C6 | 22(1)    | 19(1)    | 23(1)    | 6(1)     | 4(1)     | 6(1)     |
| C7 | 20(1)    | 38(1)    | 21(1)    | 5(1)     | 1(1)     | 3(1)     |
| O5 | 24(1)    | 24(1)    | 24(1)    | 0(1)     | 8(1)     | -2(1)    |



Table 5. Hydrogen coordinates ( $\times 10^4$ ) and isotropic displacement parameters ( $\text{\AA}^2 \times 10^3$ )

for 09192a.

|     | x    | y    | z    | U(eq) |
|-----|------|------|------|-------|
| H2A | 2967 | 4102 | 4174 | 18    |
| H2B | 2139 | 3852 | 5093 | 18    |
| H3A | 3048 | 6671 | 6247 | 31    |
| H1A | 4926 | 5019 | 7375 | 19    |
| H1B | 3839 | 3807 | 7549 | 19    |
| H4B | 5149 | 5814 | 8963 | 26    |
| H4C | 3871 | 4553 | 9096 | 26    |
| H5B | 1653 | 5586 | 7771 | 29    |
| H5C | 2044 | 6414 | 8783 | 29    |
| H4A | 3849 | 7764 | 8099 | 30    |
| H6A | 6506 | 2853 | 7740 | 26    |
| H6B | 6304 | 3090 | 8830 | 26    |
| H7A | 7993 | 5123 | 8988 | 32    |
| H7B | 9092 | 3909 | 8613 | 32    |
| H5A | 8372 | 4814 | 7184 | 36    |

Table 6. Torsion angles [°] for 09192a.

---

|               |             |
|---------------|-------------|
| C2#1-S1-C1-O3 | 61.31(11)   |
| C2#1-S1-C1-C2 | -60.06(13)  |
| C2#1-S1-C1-C3 | -179.93(10) |
| O3-C1-C2-S1#1 | -52.76(15)  |
| C3-C1-C2-S1#1 | -174.66(10) |
| S1-C1-C2-S1#1 | 69.43(13)   |
| O3-C1-C3-O2   | 7.9(2)      |
| C2-C1-C3-O2   | 129.17(15)  |
| S1-C1-C3-O2   | -111.10(14) |
| O3-C1-C3-O1   | -172.90(14) |
| C2-C1-C3-O1   | -51.61(19)  |
| S1-C1-C3-O1   | 68.12(16)   |
| C6-N1-C4-C5   | 176.13(14)  |
| N1-C4-C5-O4   | -75.05(19)  |
| C4-N1-C6-C7   | -76.19(17)  |
| N1-C6-C7-O5   | -52.99(19)  |

---

Symmetry transformations used to generate equivalent atoms:

#1 -x+1,-y+1,-z+1

Table 7. Hydrogen bonds for 09192a [ $\text{\AA}$  and  $^\circ$ ].

| D-H...A       | d(D-H) | d(H...A) | d(D...A)   | $\angle(\text{DHA})$ |
|---------------|--------|----------|------------|----------------------|
| O3-H3A...O2   | 0.84   | 2.10     | 2.5979(16) | 117.9                |
| N1-H1B...O4#2 | 0.92   | 1.92     | 2.8257(18) | 166.2                |
| N1-H1A...O3   | 0.92   | 2.07     | 2.8640(18) | 143.7                |
| O4-H4A...O1#3 | 0.84   | 1.80     | 2.6391(16) | 174.5                |
| O5-H5A...O1#1 | 0.84   | 1.91     | 2.7454(17) | 175.0                |

Symmetry transformations used to generate equivalent atoms:

#1  $-x+1, -y+1, -z+1$  #2  $-x+1/2, y-1/2, -z+3/2$  #3  $x+1/2, -y+3/2, z+1/2$

**2,5-Dihydroxy-1,4-dithiane-2,5-dicarboxylic acid, bis-(2,2',2''-nitrilotriethanol) salt (7e).**  
**CRYSTAL STRUCTURE REPORT**

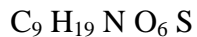

Report prepared for:

A. Monteil / Prof. S. Patterson

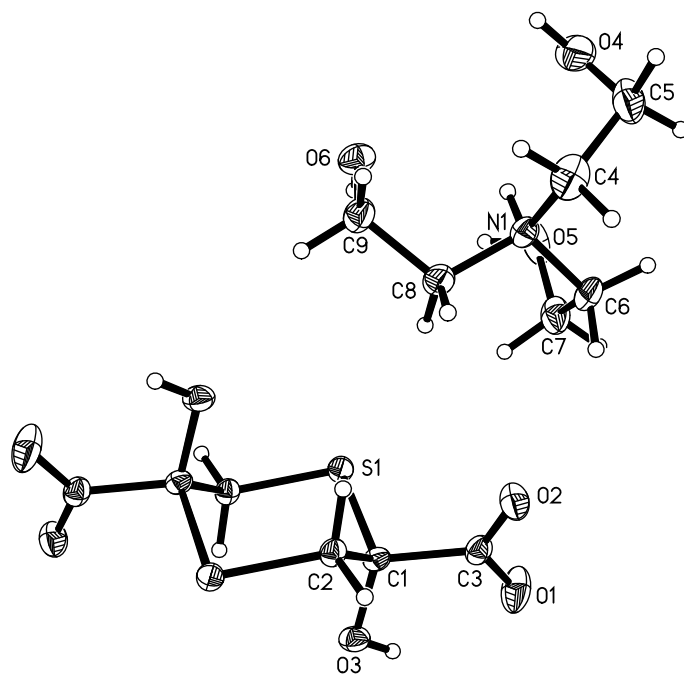

Victor G. Young, Jr.

X-Ray Crystallographic Laboratory

Department of Chemistry

University of Minnesota

207 Pleasant St. S.E.

Minneapolis, MN 55455

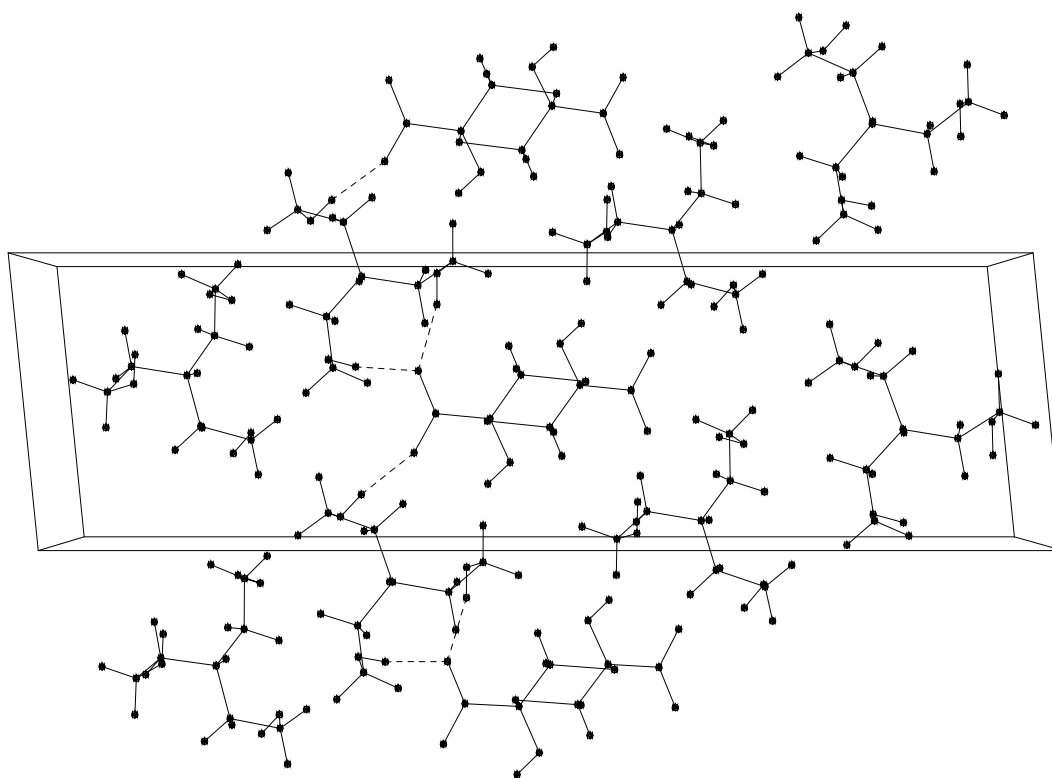

## Data collection

A crystal (approximate dimensions 0.40x 0.20 x 0.08mm<sup>3</sup>) was placed onto the tip of a 0.1 mm diameter glass capillary and mounted on a CCD area detector diffractometer for a data collection at 173(2) K.<sup>1</sup> A preliminary set of cell constants was calculated from reflections harvested from three sets of 20 frames. These initial sets of frames were oriented such that orthogonal wedges of reciprocal space were surveyed. This produced initial orientation matrices determined from 49 reflections. The data collection was carried out using MoK $\alpha$  radiation (graphite monochromator) with a frame time of 30 seconds and a detector distance of 4.8 cm. A randomly oriented region of reciprocal space was surveyed to the extent of one sphere and to a resolution of 0.77 Å. Four major sections of frames were collected with 0.30° steps in  $\omega$  at four different  $\phi$  settings and a detector position of -28° in  $2\theta$ . The intensity data were corrected for absorption and decay (SADABS).<sup>2</sup> Final cell constants were calculated from 2934 strong reflections from the actual data collection after integration (SAINT).<sup>3</sup> Please refer to Table 1 for additional crystal and refinement information.

## Structure solution and refinement

The structure was solved using Bruker SHELXTL<sup>4</sup> and refined using Bruker SHELXTL.<sup>4</sup> The space group P2<sub>1</sub>/n was determined based on systematic absences and intensity statistics. A direct-methods solution was calculated which provided most non-hydrogen atoms from the E-map. Full-matrix least squares / difference Fourier cycles were performed which located the remaining non-hydrogen atoms. All non-hydrogen atoms were refined with anisotropic displacement parameters. All hydrogen atoms were placed in ideal positions and refined as riding atoms with relative isotropic displacement parameters. The final full matrix least squares refinement converged to  $R1 = 0.0339$  and  $wR2 = 0.0886$  ( $F^2$ , obs. data).

## Structure description

The structure is the one suggested. There is one-half dianion per asymmetric unit along with one triethanolammonium cation. This is similar to the other two recent results.

Data collection and structure solution were conducted at the X-Ray Crystallographic Laboratory, 192 Kolthoff Hall, Department of Chemistry, University of Minnesota. All calculations were

performed using Pentium computers using the current SHELXTL suite of programs. All publications arising from this report MUST either 1) include Victor G. Young, Jr. as a coauthor or 2) acknowledge Victor G. Young, Jr. and the X-Ray Crystallographic Laboratory.

- 
- <sup>1</sup> SMART V5.054, Bruker Analytical X-ray Systems, Madison, WI (2001).
  - <sup>2</sup> An empirical correction for absorption anisotropy, R. Blessing, *Acta Cryst.* **A51**, 33-38(1995).
  - <sup>3</sup> SAINT+ V6.45, Bruker Analytical X-Ray Systems, Madison, WI (2003).
  - <sup>4</sup> SHELXTL V6.14, Bruker Analytical X-Ray Systems, Madison, WI (2000).

Some equations of interest:

$$R_{\text{int}} = \Sigma |F_o^2 - \langle F_o^2 \rangle| / \Sigma |F_o^2|$$

$$R_1 = \Sigma ||F_o| - |F_c|| / \Sigma |F_o|$$

$$wR2 = [\Sigma [w(F_o^2 - F_c^2)^2] / \Sigma [w(F_o^2)^2]]^{1/2}$$

where  $w = q / [\sigma^2(F_o^2) + (a^*P)^2 + b^*P + d + e^*\sin(\theta)]$

$$\text{GooF} = S = [\Sigma [w(F_o^2 - F_c^2)^2] / (n-p)]^{1/2}$$



Table 1. Crystal data and structure refinement for 09198a.

---

|                                 |                                                         |                           |
|---------------------------------|---------------------------------------------------------|---------------------------|
| Identification code             | 09198a                                                  |                           |
| Empirical formula               | C <sub>9</sub> H <sub>19</sub> N O <sub>6</sub> S       |                           |
| Formula weight                  | 269.31                                                  |                           |
| Temperature                     | 173(2) K                                                |                           |
| Wavelength                      | 0.71073 Å                                               |                           |
| Crystal system                  | Monoclinic                                              |                           |
| Space group                     | P2 <sub>1</sub> /n                                      |                           |
| Unit cell dimensions            | $a = 7.9344(9) \text{ \AA}$                             | $\alpha = 90^\circ$       |
|                                 | $b = 5.7430(6) \text{ \AA}$                             | $\beta = 95.749(2)^\circ$ |
|                                 | $c = 27.174(3) \text{ \AA}$                             | $\gamma = 90^\circ$       |
| Volume                          | 1232.0(2) Å <sup>3</sup>                                |                           |
| Z                               | 4                                                       |                           |
| Density (calculated)            | 1.452 Mg/m <sup>3</sup>                                 |                           |
| Absorption coefficient          | 0.280 mm <sup>-1</sup>                                  |                           |
| $F(000)$                        | 576                                                     |                           |
| Crystal color, morphology       | Colorless, Plate                                        |                           |
| Crystal size                    | 0.40 x 0.20 x 0.08 mm <sup>3</sup>                      |                           |
| Theta range for data collection | 1.51 to 27.51°                                          |                           |
| Index ranges                    | $-10 \leq h \leq 10, 0 \leq k \leq 7, 0 \leq l \leq 35$ |                           |
| Reflections collected           | 14674                                                   |                           |
| Independent reflections         | 2825 [ $R(\text{int}) = 0.0364$ ]                       |                           |

|                                        |                                       |
|----------------------------------------|---------------------------------------|
| Observed reflections                   | 2341                                  |
| Completeness to $\theta = 27.51^\circ$ | 99.5%                                 |
| Absorption correction                  | Multi-scan                            |
| Max. and min. transmission             | 0.978 and 0.935                       |
| Refinement method                      | Full-matrix least-squares on $F^2$    |
| Data / restraints / parameters         | 2825 / 0 / 158                        |
| Goodness-of-fit on $F^2$               | 1.047                                 |
| Final $R$ indices [ $I > 2\sigma(I)$ ] | $R1 = 0.0339$ , $wR2 = 0.0827$        |
| $R$ indices (all data)                 | $R1 = 0.0448$ , $wR2 = 0.0886$        |
| Largest diff. peak and hole            | 0.458 and -0.323 e. $\text{\AA}^{-3}$ |

Table 2. Atomic coordinates ( $\times 10^4$ ) and equivalent isotropic displacement parameters ( $\text{\AA}^2 \times 10^3$ )

for 09198a.  $U_{\text{eq}}$  is defined as one third of the trace of the orthogonalized  $U_{ij}$  tensor.

|    | x        | y        | z       | $U_{\text{eq}}$ |
|----|----------|----------|---------|-----------------|
| S1 | 5697(1)  | 6656(1)  | 5523(1) | 18(1)           |
| C1 | 5592(2)  | 3447(3)  | 5478(1) | 16(1)           |
| C2 | 4075(2)  | 2731(3)  | 5121(1) | 16(1)           |
| C3 | 5410(2)  | 2599(3)  | 6013(1) | 19(1)           |
| O1 | 6755(2)  | 2172(3)  | 6265(1) | 37(1)           |
| O2 | 3940(2)  | 2422(2)  | 6144(1) | 27(1)           |
| O3 | 7096(1)  | 2551(2)  | 5318(1) | 21(1)           |
| N1 | 907(2)   | 7544(2)  | 6536(1) | 20(1)           |
| C4 | -839(2)  | 6853(3)  | 6646(1) | 34(1)           |
| C5 | -1326(2) | 8197(4)  | 7094(1) | 42(1)           |
| O4 | -1109(2) | 10610(3) | 7031(1) | 40(1)           |
| C6 | 2249(2)  | 6431(3)  | 6887(1) | 27(1)           |
| C7 | 3890(2)  | 7767(4)  | 6901(1) | 33(1)           |
| O5 | 3584(2)  | 10156(2) | 6985(1) | 37(1)           |
| C8 | 1207(2)  | 7135(3)  | 6005(1) | 26(1)           |
| C9 | 338(2)   | 8947(3)  | 5664(1) | 26(1)           |
| O6 | 636(2)   | 11245(2) | 5847(1) | 27(1)           |

Table 3. Bond lengths [ $\text{\AA}$ ] and angles [ $^\circ$ ] for 09198a.

---

|                  |            |                |            |
|------------------|------------|----------------|------------|
| S(1)-C(2)#1      | 1.8122(15) | C(5)-O(4)      | 1.409(3)   |
| S(1)-C(1)        | 1.8484(15) | C(5)-H(5B)     | 0.9900     |
| C(1)-O(3)        | 1.4084(18) | C(5)-H(5C)     | 0.9900     |
| C(1)-C(2)        | 1.525(2)   | O(4)-H(4A)     | 0.8400     |
| C(1)-C(3)        | 1.553(2)   | C(6)-C(7)      | 1.509(3)   |
| C(2)-S(1)#1      | 1.8122(15) | C(6)-H(6B)     | 0.9900     |
| C(2)-H(2A)       | 0.9900     | C(6)-H(6C)     | 0.9900     |
| C(2)-H(2B)       | 0.9900     | C(7)-O(5)      | 1.416(3)   |
| C(3)-O(1)        | 1.233(2)   | C(7)-H(7A)     | 0.9900     |
| C(3)-O(2)        | 1.2565(19) | C(7)-H(7B)     | 0.9900     |
| O(3)-H(3A)       | 0.8400     | O(5)-H(5A)     | 0.8400     |
| N(1)-C(6)        | 1.499(2)   | C(8)-C(9)      | 1.513(2)   |
| N(1)-C(4)        | 1.500(2)   | C(8)-H(8A)     | 0.9900     |
| N(1)-C(8)        | 1.502(2)   | C(8)-H(8B)     | 0.9900     |
| N(1)-H(1A)       | 0.9300     | C(9)-O(6)      | 1.422(2)   |
| C(4)-C(5)        | 1.524(3)   | C(9)-H(9A)     | 0.9900     |
| C(4)-H(4B)       | 0.9900     | C(9)-H(9B)     | 0.9900     |
| C(4)-H(4C)       | 0.9900     | O(6)-H(6A)     | 0.8400     |
| C(2)#1-S(1)-C(1) | 97.93(7)   | O(3)-C(1)-C(3) | 109.67(12) |
| O(3)-C(1)-C(2)   | 110.07(12) | C(2)-C(1)-C(3) | 111.71(12) |

|                   |            |                  |            |
|-------------------|------------|------------------|------------|
| O(3)-C(1)-S(1)    | 110.51(10) | C(5)-C(4)-H(4C)  | 109.7      |
| C(2)-C(1)-S(1)    | 109.79(10) | H(4B)-C(4)-H(4C) | 108.2      |
| C(3)-C(1)-S(1)    | 104.98(10) | O(4)-C(5)-C(4)   | 110.96(16) |
| C(1)-C(2)-S(1)#1  | 114.46(10) | O(4)-C(5)-H(5B)  | 109.4      |
| C(1)-C(2)-H(2A)   | 108.6      | C(4)-C(5)-H(5B)  | 109.4      |
| S(1)#1-C(2)-H(2A) | 108.6      | O(4)-C(5)-H(5C)  | 109.4      |
| C(1)-C(2)-H(2B)   | 108.6      | C(4)-C(5)-H(5C)  | 109.4      |
| S(1)#1-C(2)-H(2B) | 108.6      | H(5B)-C(5)-H(5C) | 108.0      |
| H(2A)-C(2)-H(2B)  | 107.6      | C(5)-O(4)-H(4A)  | 109.5      |
| O(1)-C(3)-O(2)    | 127.11(15) | N(1)-C(6)-C(7)   | 110.83(14) |
| O(1)-C(3)-C(1)    | 115.15(14) | N(1)-C(6)-H(6B)  | 109.5      |
| O(2)-C(3)-C(1)    | 117.75(13) | C(7)-C(6)-H(6B)  | 109.5      |
| C(1)-O(3)-H(3A)   | 109.5      | N(1)-C(6)-H(6C)  | 109.5      |
| C(6)-N(1)-C(4)    | 111.82(13) | C(7)-C(6)-H(6C)  | 109.5      |
| C(6)-N(1)-C(8)    | 111.87(13) | H(6B)-C(6)-H(6C) | 108.1      |
| C(4)-N(1)-C(8)    | 112.84(13) | O(5)-C(7)-C(6)   | 109.59(15) |
| C(6)-N(1)-H(1A)   | 106.6      | O(5)-C(7)-H(7A)  | 109.8      |
| C(4)-N(1)-H(1A)   | 106.6      | C(6)-C(7)-H(7A)  | 109.8      |
| C(8)-N(1)-H(1A)   | 106.6      | O(5)-C(7)-H(7B)  | 109.8      |
| N(1)-C(4)-C(5)    | 109.81(15) | C(6)-C(7)-H(7B)  | 109.8      |
| N(1)-C(4)-H(4B)   | 109.7      | H(7A)-C(7)-H(7B) | 108.2      |
| C(5)-C(4)-H(4B)   | 109.7      | C(7)-O(5)-H(5A)  | 109.5      |
| N(1)-C(4)-H(4C)   | 109.7      | N(1)-C(8)-C(9)   | 111.95(14) |

|                  |            |
|------------------|------------|
| N(1)-C(8)-H(8A)  | 109.2      |
| C(9)-C(8)-H(8A)  | 109.2      |
| N(1)-C(8)-H(8B)  | 109.2      |
| C(9)-C(8)-H(8B)  | 109.2      |
| H(8A)-C(8)-H(8B) | 107.9      |
| O(6)-C(9)-C(8)   | 111.96(13) |
| O(6)-C(9)-H(9A)  | 109.2      |
| C(8)-C(9)-H(9A)  | 109.2      |
| O(6)-C(9)-H(9B)  | 109.2      |
| C(8)-C(9)-H(9B)  | 109.2      |
| H(9A)-C(9)-H(9B) | 107.9      |
| C(9)-O(6)-H(6A)  | 109.5      |

---

Symmetry transformations used to generate equivalent atoms:

#1  $-x+1,-y+1,-z+1$

Table 4. Anisotropic displacement parameters ( $\text{\AA}^2 \times 10^3$ ) for 09198a. The anisotropic displacement factor exponent takes the form:  $-2\pi^2 [h^2 a^{*2} U_{11} + \dots + 2 h k a^* b^* U_{12}]$

|    | $U_{11}$ | $U_{22}$ | $U_{33}$ | $U_{23}$ | $U_{13}$ | $U_{12}$ |
|----|----------|----------|----------|----------|----------|----------|
| S1 | 23(1)    | 14(1)    | 16(1)    | -2(1)    | 0(1)     | -1(1)    |
| C1 | 18(1)    | 13(1)    | 19(1)    | 0(1)     | 1(1)     | 1(1)     |
| C2 | 19(1)    | 13(1)    | 17(1)    | 1(1)     | 1(1)     | -2(1)    |
| C3 | 24(1)    | 15(1)    | 19(1)    | 1(1)     | 0(1)     | -2(1)    |
| O1 | 29(1)    | 54(1)    | 27(1)    | 16(1)    | -6(1)    | -2(1)    |
| O2 | 26(1)    | 33(1)    | 21(1)    | 3(1)     | 5(1)     | -2(1)    |
| O3 | 18(1)    | 22(1)    | 23(1)    | -2(1)    | 0(1)     | 5(1)     |
| N1 | 23(1)    | 16(1)    | 20(1)    | 2(1)     | 0(1)     | -1(1)    |
| C4 | 24(1)    | 35(1)    | 40(1)    | 8(1)     | -3(1)    | -11(1)   |
| C5 | 23(1)    | 75(2)    | 29(1)    | 18(1)    | 4(1)     | 4(1)     |
| O4 | 37(1)    | 56(1)    | 25(1)    | -3(1)    | -6(1)    | 17(1)    |
| C6 | 29(1)    | 27(1)    | 24(1)    | 9(1)     | -2(1)    | 6(1)     |
| C7 | 24(1)    | 51(1)    | 23(1)    | 10(1)    | -1(1)    | 4(1)     |
| O5 | 46(1)    | 45(1)    | 19(1)    | -3(1)    | 7(1)     | -19(1)   |
| C8 | 37(1)    | 22(1)    | 20(1)    | -2(1)    | 0(1)     | 7(1)     |
| C9 | 29(1)    | 25(1)    | 22(1)    | 2(1)     | -3(1)    | 2(1)     |
| O6 | 24(1)    | 20(1)    | 38(1)    | 2(1)     | 5(1)     | 0(1)     |



Table 5. Hydrogen coordinates ( $\times 10^4$ ) and isotropic displacement parameters ( $\text{\AA}^2 \times 10^3$ )

for 09198a.

|     | x     | y     | z    | U(eq) |
|-----|-------|-------|------|-------|
| H2A | 3057  | 3550  | 5215 | 20    |
| H2B | 3883  | 1039  | 5158 | 20    |
| H3A | 7826  | 2397  | 5561 | 31    |
| H1A | 994   | 9141  | 6588 | 24    |
| H4B | -871  | 5160  | 6713 | 40    |
| H4C | -1661 | 7191  | 6356 | 40    |
| H5B | -2524 | 7870  | 7142 | 50    |
| H5C | -615  | 7670  | 7393 | 50    |
| H4A | -1844 | 11105 | 6813 | 59    |
| H6B | 2434  | 4809  | 6781 | 32    |
| H6C | 1866  | 6385  | 7222 | 32    |
| H7A | 4708  | 7151  | 7168 | 39    |
| H7B | 4385  | 7575  | 6583 | 39    |
| H5A | 3819  | 10936 | 6740 | 55    |
| H8A | 780   | 5571  | 5903 | 32    |
| H8B | 2440  | 7169  | 5975 | 32    |
| H9A | 756   | 8815  | 5334 | 31    |

|     |      |       |      |    |
|-----|------|-------|------|----|
| H9B | -897 | 8642  | 5625 | 31 |
| H6A | 1682 | 11507 | 5882 | 41 |

---

Table 6. Torsion angles [°] for 09198a.

---

|               |             |
|---------------|-------------|
| C2#1-S1-C1-O3 | 61.24(11)   |
| C2#1-S1-C1-C2 | -60.37(12)  |
| C2#1-S1-C1-C3 | 179.41(10)  |
| O3-C1-C2-S1#1 | -50.82(15)  |
| C3-C1-C2-S1#1 | -172.92(10) |
| S1-C1-C2-S1#1 | 71.05(12)   |
| O3-C1-C3-O1   | 27.36(19)   |
| C2-C1-C3-O1   | 149.68(15)  |
| S1-C1-C3-O1   | -91.39(15)  |
| O3-C1-C3-O2   | -152.68(14) |
| C2-C1-C3-O2   | -30.35(19)  |
| S1-C1-C3-O2   | 88.58(15)   |
| C6-N1-C4-C5   | 76.94(19)   |
| C8-N1-C4-C5   | -155.90(15) |
| N1-C4-C5-O4   | 52.7(2)     |
| C4-N1-C6-C7   | -158.90(15) |
| C8-N1-C6-C7   | 73.42(18)   |
| N1-C6-C7-O5   | 51.16(19)   |
| C6-N1-C8-C9   | -157.40(15) |
| C4-N1-C8-C9   | 75.46(19)   |
| N1-C8-C9-O6   | 47.2(2)     |

---

Symmetry transformations used to generate equivalent atoms:

#1  $-x+1,-y+1,-z+1$

Table 7. Hydrogen bonds for 09198a [ $\text{\AA}$  and  $^\circ$ ].

| D-H...A       | d(D-H) | d(H...A) | d(D...A)   | $\angle(\text{DHA})$ |
|---------------|--------|----------|------------|----------------------|
| O3-H3A...O6#2 | 0.84   | 2.38     | 3.1167(16) | 146.8                |
| N1-H1A...O4   | 0.93   | 2.31     | 2.811(2)   | 113.2                |
| N1-H1A...O5   | 0.93   | 2.30     | 2.7805(19) | 111.8                |
| N1-H1A...O6   | 0.93   | 2.34     | 2.8248(18) | 112.1                |
| O4-H4A...O1#3 | 0.84   | 1.87     | 2.7042(17) | 171.9                |
| O5-H5A...O2#4 | 0.84   | 1.84     | 2.6704(17) | 168.7                |
| O6-H6A...O2#4 | 0.84   | 1.93     | 2.7490(18) | 163.6                |

Symmetry transformations used to generate equivalent atoms:

#1  $-x+1, -y+1, -z+1$  #2  $x+1, y-1, z$  #3  $x-1, y+1, z$

#4  $x, y+1, z$

AM-12-452-H

Sample Name: AM-12-452-H  
Data Collected on: mm6003-vnmr500  
Acquire Method: 1D  
Sample directory: 20121001\_AM-12-452-H\_01  
F1 file: AM-12-452-H\_PROTON\_01  
Pulse Sequence: PROTON (zgpg30)  
Solvent: d2o  
Date collected on: Oct 1 2012

Temp: 25.0 C / 298.1 K  
Operator: monle103  
Relax. delay 2.000 sec  
Pulse: zgpg30  
Acq. time: 1.49 sec  
Width: 665.1 Hz  
16 repetitions  
OBSERVE: H1, 539.681455 MHz  
DATA PROCESSING  
FT size 32768  
Total time 0 min 59 sec

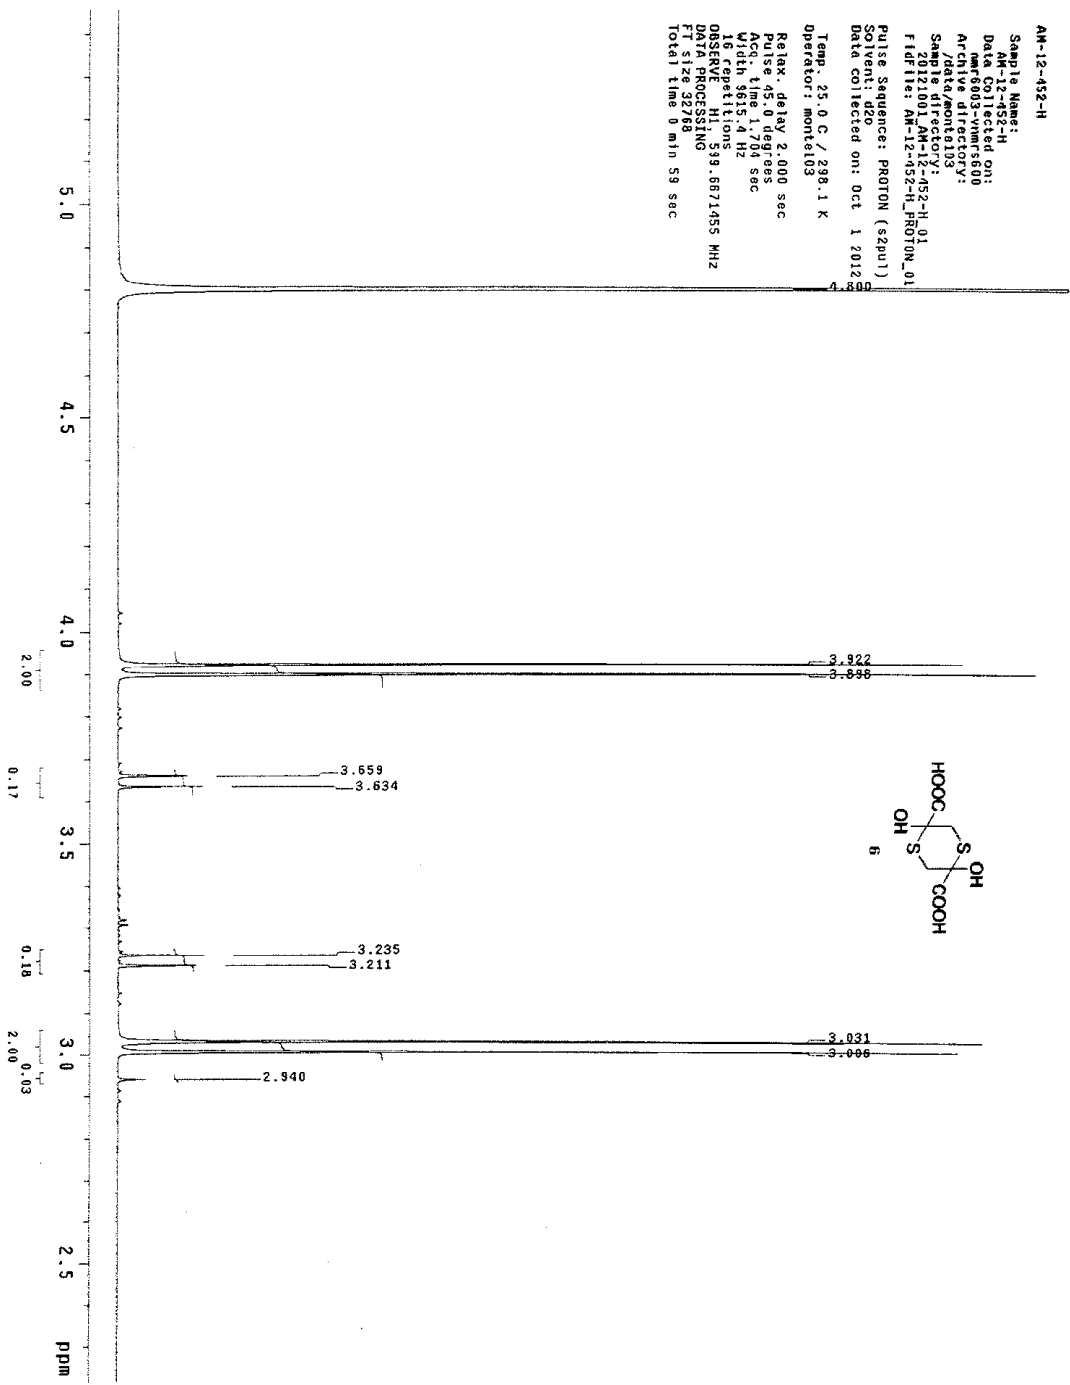

AM-12-452-H-13C

Sample Name:  
AM-12-452-H-13C  
Data Collected on:  
nmr5003-vmr6600  
Acquire directory:  
Sample directory:  
20121001\_AM-12-452-H-13C\_01  
File: AM-12-452-H-13C\_CARBON\_01  
Pulse Sequence: CARBON (zgpg3)  
Solvent: DMSO  
Data collected on: Oct 1 2012

Temp: 25.0 C / 298.1 K  
Operator: montei03  
Relax. delay: 2.000 sec  
Pulse: 45.0 degrees  
Acq. time: 0.865 sec  
F1: 100.628 MHz  
286 Taps: 1.000 sec  
OBSERVE: C13, 150.7662978 MHz  
DECUPLE: H1, 599.6710621 MHz  
Power: 36 dB  
CONTINUOUSLY ON  
Acquire directory:  
Sample directory:  
DATA PROCESSING  
Line broadening: 0.5 Hz  
FT size: 65536  
Total time: 12 min

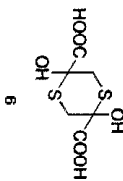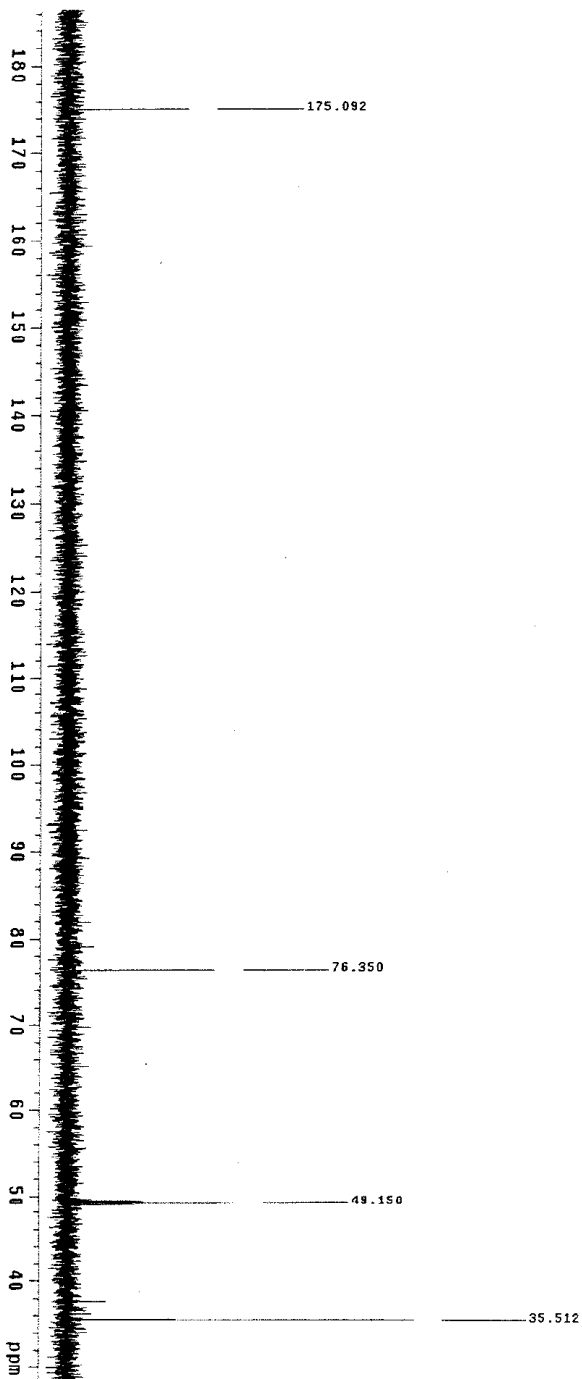

AM-11-352-M  
 Sample Name:  
 AM-11-352-M  
 Data Collected on:  
 nmr6003-ymrs600  
 Archive directory:  
 data/mon6103  
 Sample Name:  
 2010518 AM-11-352-M  
 FID file: AM-11-352-M\_PROTON\_01  
 Pulse Sequence: PROTON (szpu1)  
 Solvent: D2O  
 Data collected on: May 18 2011  
 Temp: 25.0 C / 298.1 K  
 Operator: mont6103  
 Relax delay: 2.000 sec  
 Pulse: 45.0 degrees  
 Acq. time: 1.794 sec  
 Freq: 301.4 MHz  
 1600000  
 OBSERVE: H1  
 599.8801754 MHz  
 DATA PROCESSING  
 FT size: 32768  
 Total time: 0 min 59 sec

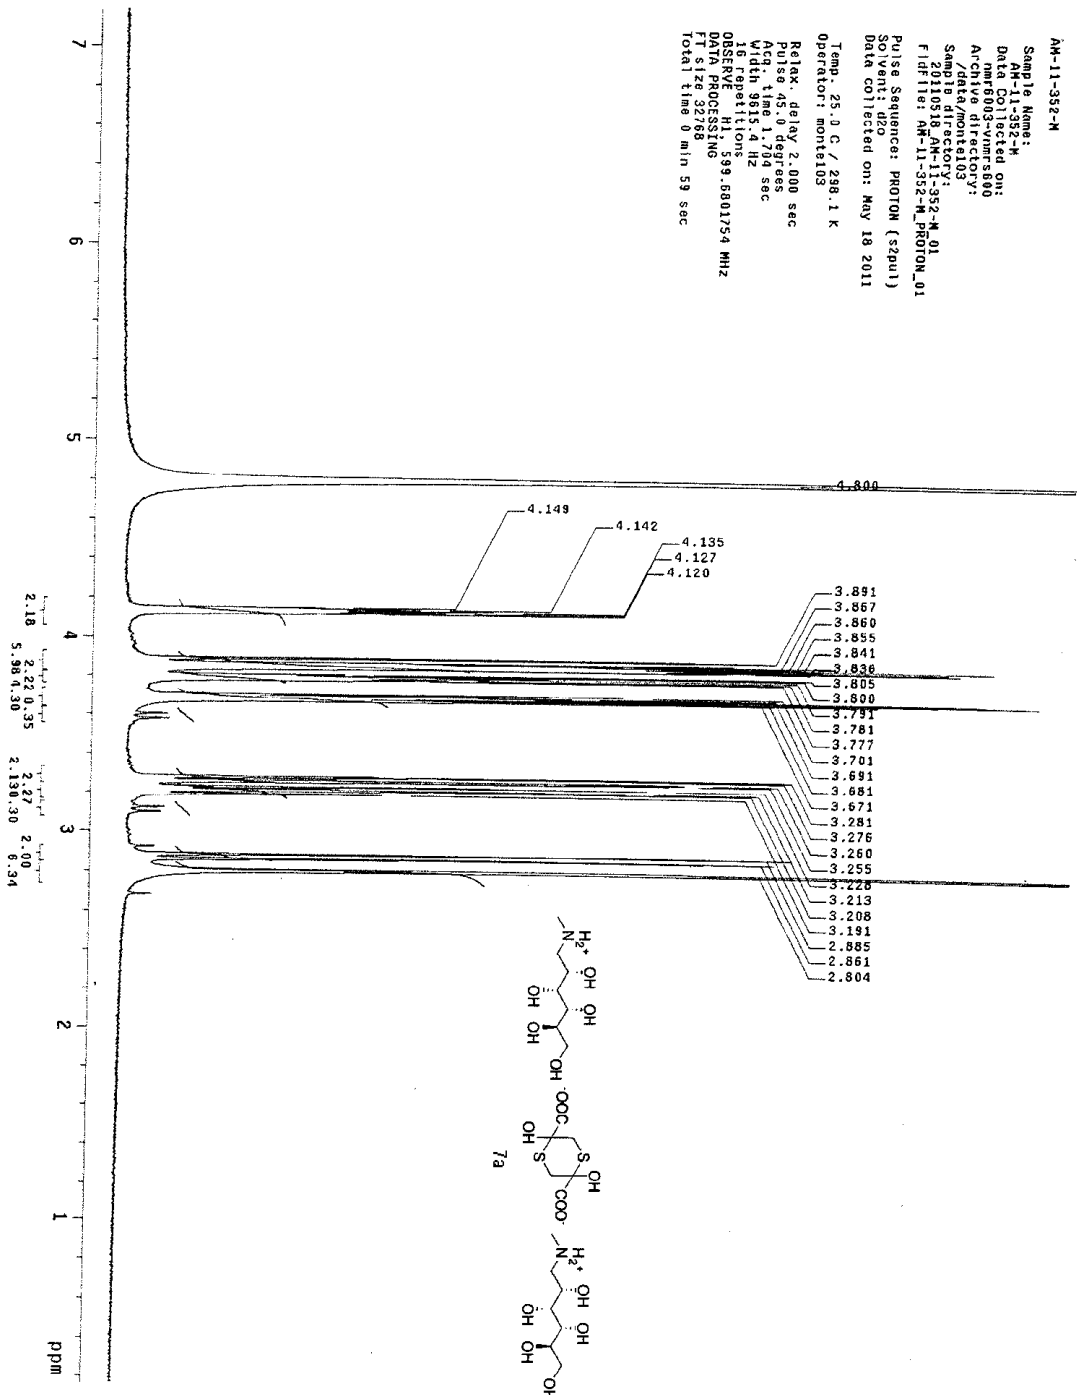



Sulfanegen\_Meglumine\_AW-11-352-M\_

Sample Name: Sulfanegen\_Meglumine\_AW-11-352-M\_

Data Collector on: 11/03/2011 14:50:00  
Date: 11/03/2011 14:50:00  
File: /data/monte103  
Sample directory: 20110518\_Sulfanegen\_Meglumine\_AW-11-352-M\_01  
FID file: Sulfanegen\_Meglumine\_AW-11-352-M\_CARBON\_01  
Pulse Sequence: CARBON (32pu)  
Solvent: CD66  
Data collected on: May 18 2011  
Temp: 25.0 C / 298.1 K  
Operator: monte103  
Relax. delay 2.000 sec  
Pulse 45.0 degrees  
Pulse width 12.000 sec  
Width 37878.8 Hz  
256 repetitions  
OBSERVE C13, 150.7896033 MHz  
DECUPLE H1, 599.6817821 MHz  
Power 42 dB  
CONTINUOUSLY ON  
WALTZ161 cancelled  
DATA PROCESSING  
Line broadening 0.5 Hz  
FT size 65536  
Total time 12 min

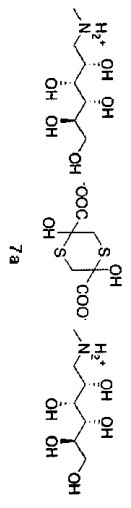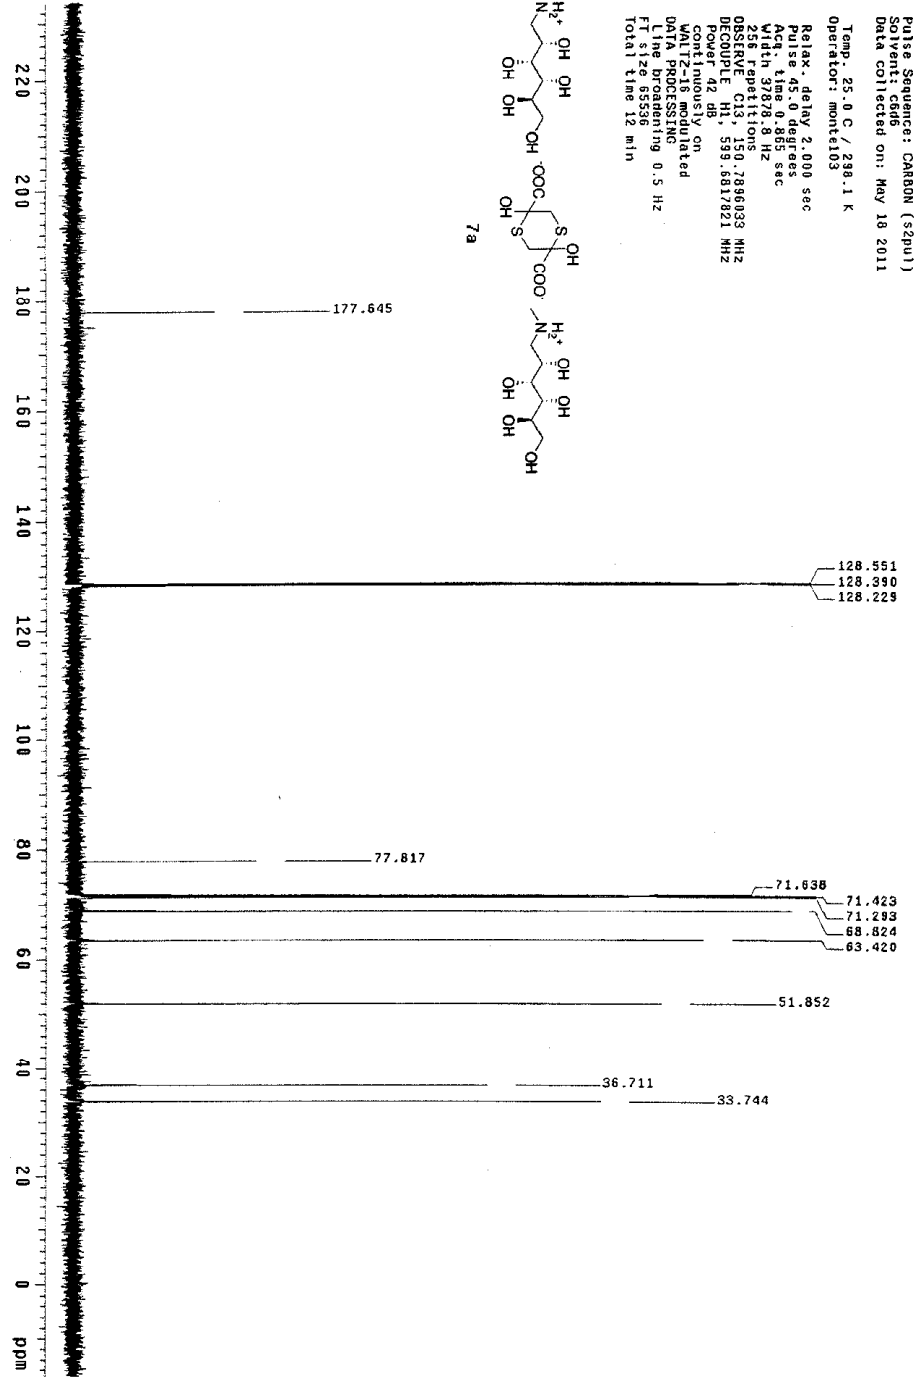

AM-11-354-G-S\_

Sample Name:  
 AM-11-354-G-S\_

Date Collected On:  
 11/16/03-11/16/03

Archive directory:  
 /data/archive/

Sample directory:  
 20110806-AM-11-354-G-S\_

FID file:  
 AM-11-354-G-S\_ PROTON\_01

Pulse Sequence:  
 PROTON (s2pul)

Solvent:  
 D2O

DATA collected on:  
 Jun 6 2011

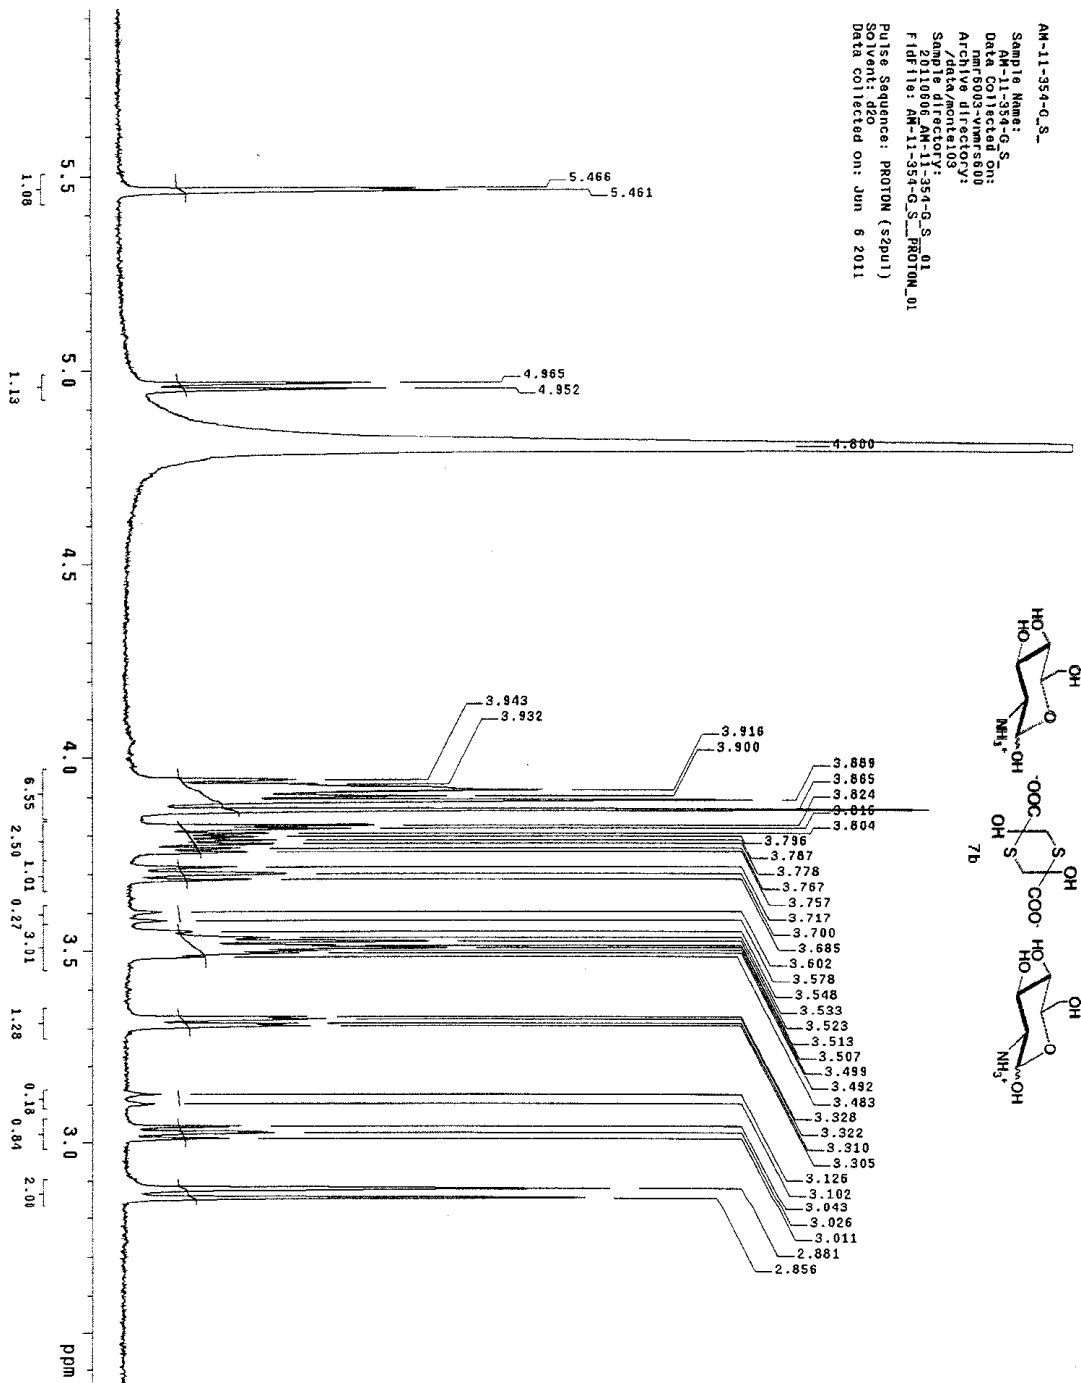

Sulfamonomoxime  
 Sulfamonomoxime  
 Data collected on: 05/24/2011  
 File: 20110524\_Sulfamonomoxime\_AW-11-353-Q\_01  
 Sample Name: Sulfamonomoxime  
 Sample ID: 20110524\_Sulfamonomoxime\_AW-11-353-Q\_01  
 File: Sulfamonomoxime\_AW-11-353-Q\_01  
 Pulse Sequence: CARBON (zgpg30)  
 Solvent: CDCl3  
 Data collected on: May 24 2011

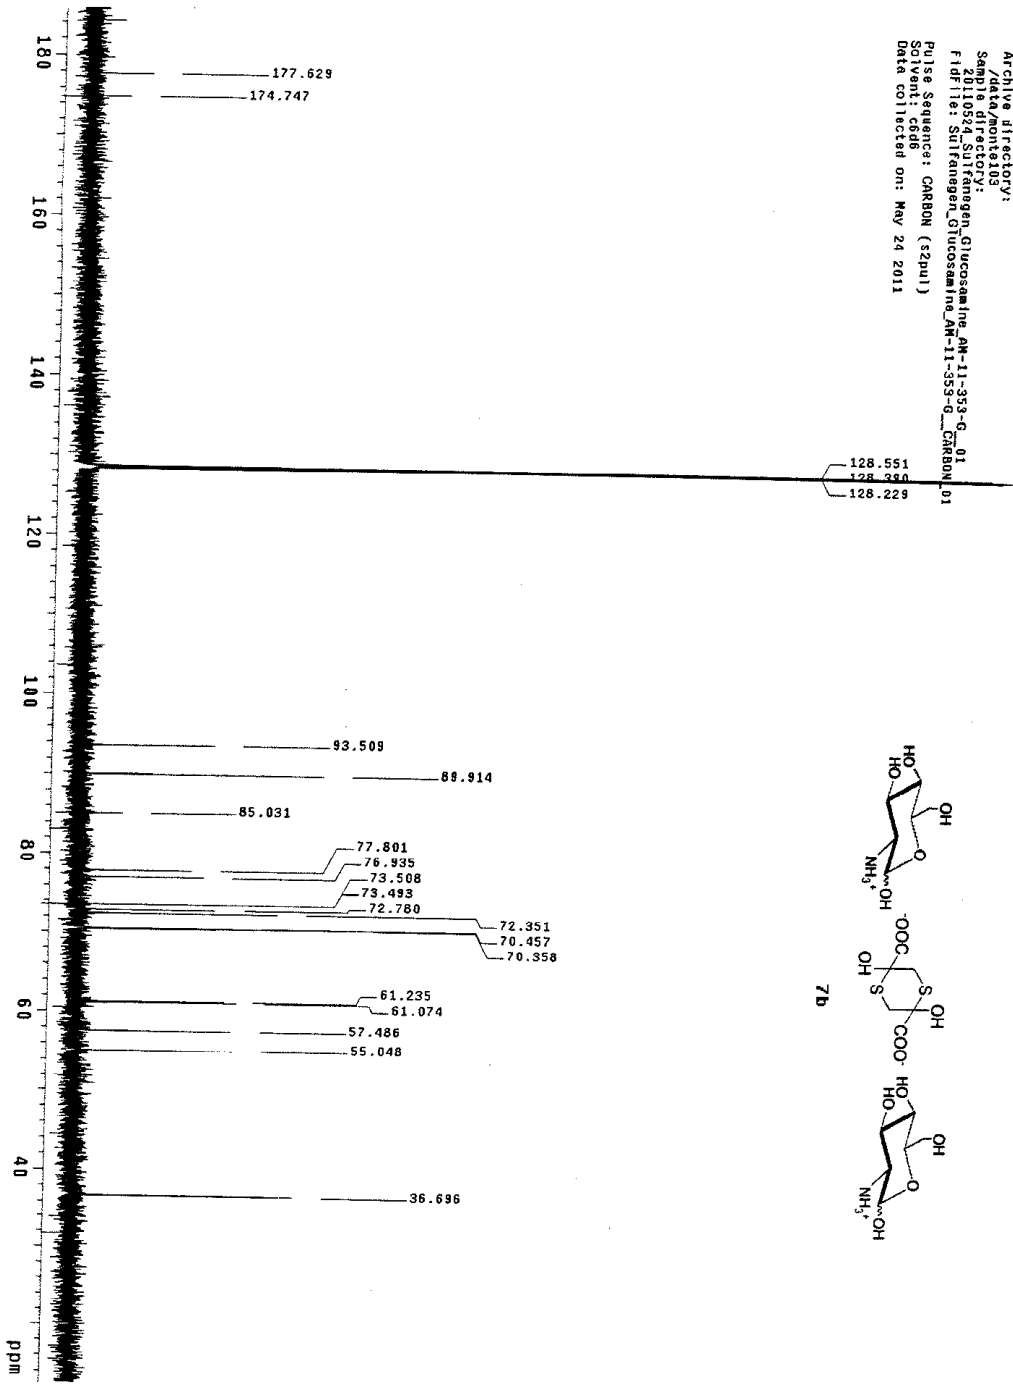

Sulfafenege\_Ethanolamine\_AM-11-346\_

Sample Name: Sulfafenege\_Ethanolamine\_AM-11-346\_

Data Collected on: nmr603-vmr560

Archive directory: Sample/mon0103

Sample Name: 20110425\_Sulfafenege\_Ethanolamine\_AM-11-346\_

File Name: Sulfafenege\_Ethanolamine\_AM-11-346\_1.FID

Pulse Sequence: PROTON (s2pu1)

Sample Temp: 25.02 C

Data Collected on: Apr 25 2011

Temp: 25.0 C / 238.1 K

Operator: montel03

Relax. delay: 2.000 sec

Pulse: 45.0 degrees

Acq. time: 1.704 sec

Solvent: H2O

2D: 32

3D: 32

4D: 32

5D: 32

OBSERVE: 1H

PROBHD: 5mm QNP 1H/13

DATA PROCESSING

FT size: 32768

Total time: 1 min 59 sec

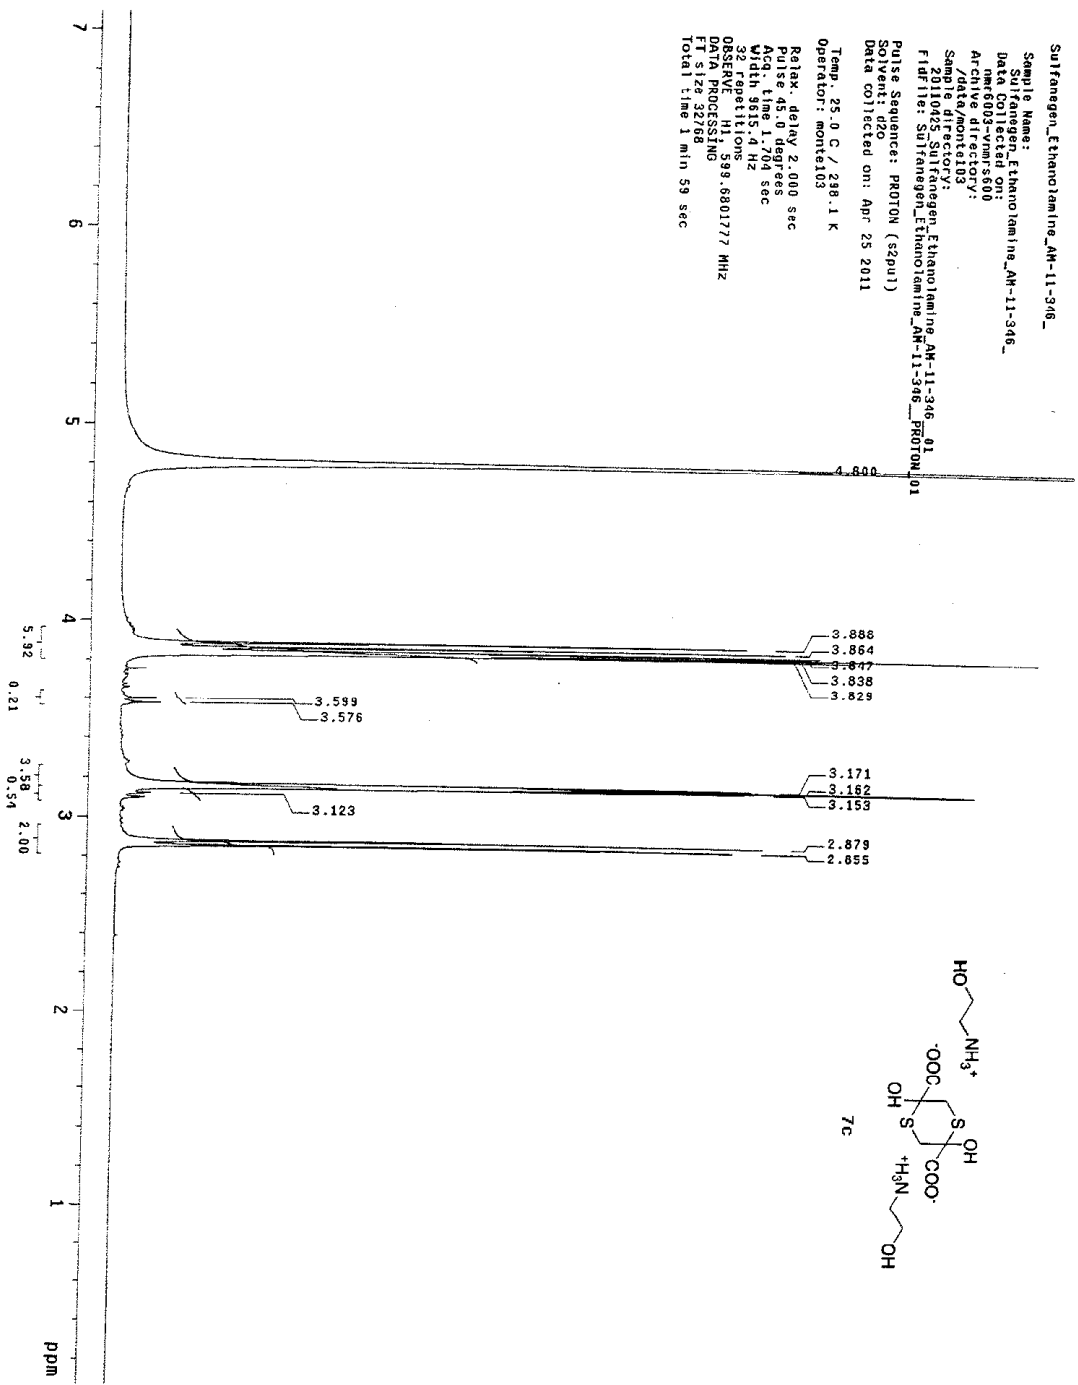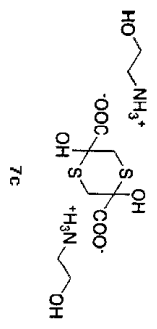

sulfamagen\_ethanolamine\_AW-11-346\_

Sample Name: sulfamagen\_ethanolamine\_AW-11-346\_  
Data Collection: nmr6003-vmr6800  
Archive directory: /data/mon103  
Sample directory: /data/mon103  
File: 4122\_Sulfamagen\_ethanolamine\_AW-11-346\_01  
Fid file: sulfamagen\_ethanolamine\_AW-11-346\_CARBON\_01  
Pulse Sequence: CARBON (zpu1)  
Solvent: c6d6  
Data collected on: Apr 27 2011

Temp: 25.0 C / 298.1 K  
Operator: montal03  
Relax. delay: 1.000 sec  
Pulse: 45.0 degrees  
Acq. time: 0.865 sec  
Width: 37878.8 Hz  
Sweep rate: 120.789699 MHz  
OBSERVE CH: 13C-5017821 MHz  
Power: 42 dB  
continously on  
WALTZ-16 modulated  
DATA PROCESSING  
F2: 125.760558  
F1: 400.141958  
Total time: 7 min 57 sec

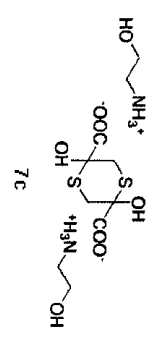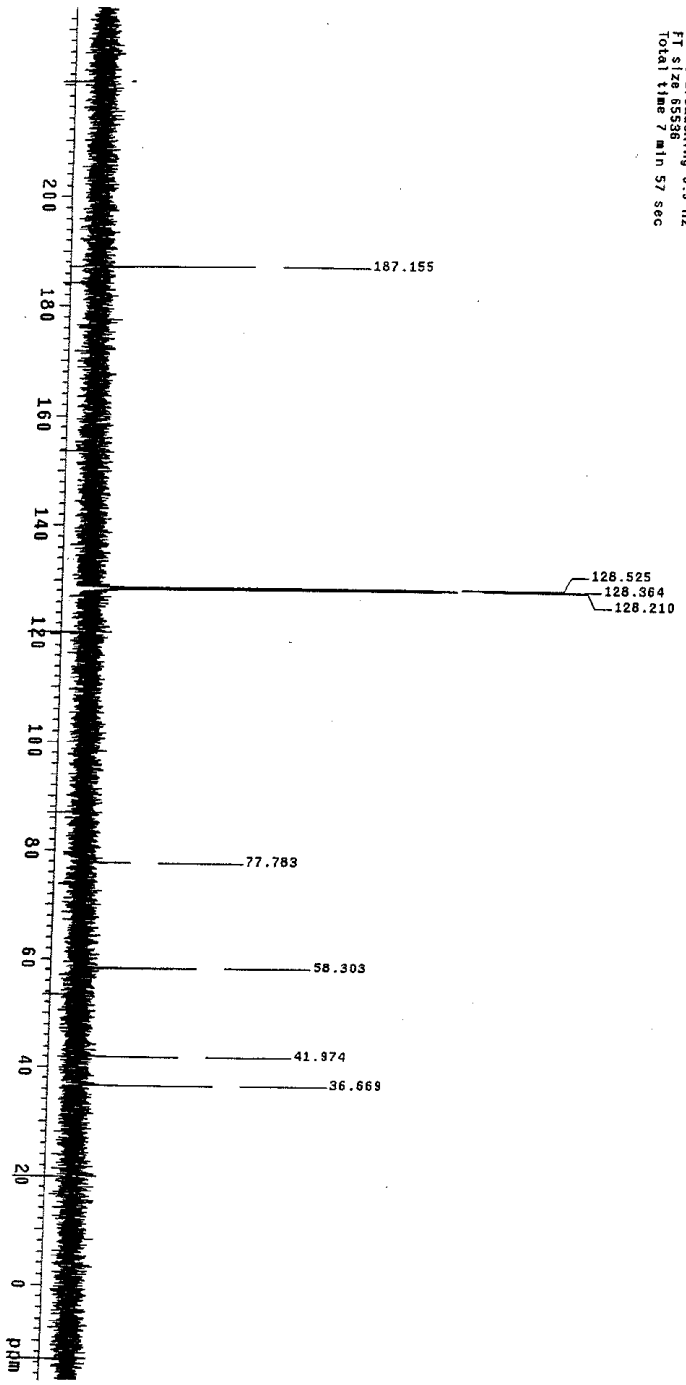

Sulfanegen\_DEA\_AH-11-347-DEA\_

Sample Name:  
Sulfanegen DEA\_AH-11-347-DEA\_  
Data Collected on:  
nmr6003-vnmr5800  
Acquire directory:  
Sample directory:  
Sample name:  
20110427 Sulfanegen\_DEA\_AH-11-347-DEA\_01  
Fidfile: Sulfanegen\_DEA\_AH-11-347-DEA\_\_PROTON\_01  
SOLVENT: D2O  
Pulse Sequence: PROTON (s2pu1)  
Data collected on: Apr 27 2011

Temp: 25.0 C / 298.1 K  
Operator: montel03  
Relax. delay 2.000 sec  
Pulse 45.0 degrees  
Acq. time 1.704 sec  
Waltz 170.4 Hz  
8 repeats  
OBSERVE: H1 599.6801783 MHz  
DATA PROCESSING:  
FT size 32768  
Total time 0 min 30 sec

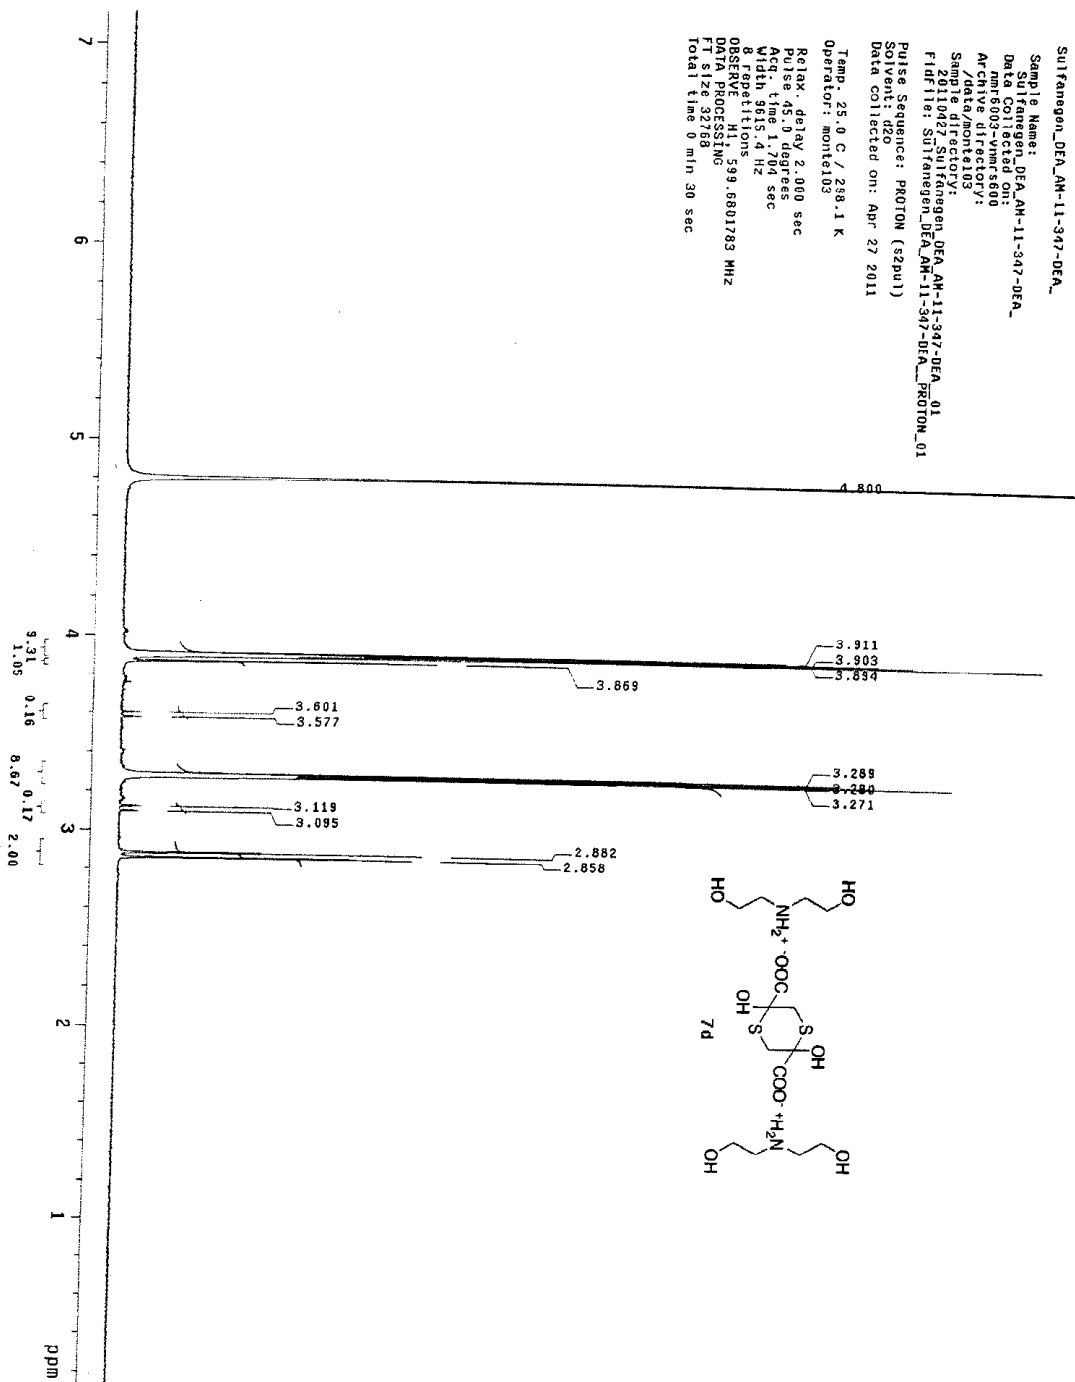

Sulfamogon\_DEA\_AM-11-347-DEA\_

Sample Name: Sulfamogon\_DEA\_AM-11-347-DEA\_  
Data Collected on: mmf-6003-vmmf-s00  
Archive directory: /data/monte103  
Sample ID: 20110427  
File Name: Sulfamogon\_DEA\_AM-11-347-DEA\_01  
Pulse Sequence: CARBON (spun)  
Solvent: cd8  
Data Collected on: Mar 25 2011

Temp: 25.0 C / 298.1 K  
Operator: monte103  
Relax. delay: 1.000 sec  
Pulse: 45.0 degrees  
Acq. time: 0.885 sec  
Width: 37878.8 Hz  
256 repetitions  
QZ90  
DECORF: C13, 150.7896003 MHz  
Power: 56.141, 539.6817821 MHz  
Continuously on  
WALTZ-16 modulated  
DATA PROCESSING  
Line broadening: 0.5 Hz  
F1 size: 65536  
Total time: 7 min 57 sec

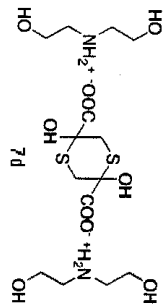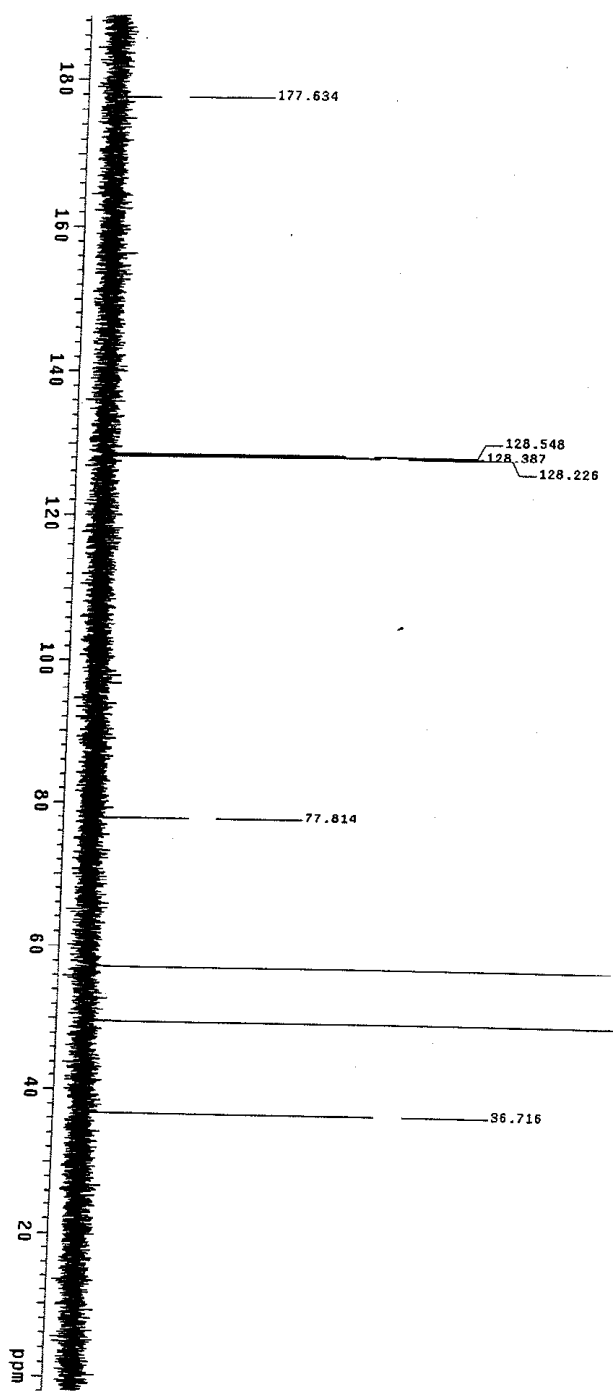

Sulfafengon\_TEA

Sample Name: Sulfafengon\_TEA  
Date Acquired: 08/03/2012 09:58:00  
Archive directory: /data/monte103  
Sample directory: /20121002\_Sulfafengon\_TEA\_01  
File Name: Sulfafengon\_TEA\_PROTON\_01  
Pulse Sequence: PROTON (szpu1)  
Solvent: d2o  
Data collected on: Oct 2 2012

Temp: 25.0 C / 298.1 K  
Operator: monte103  
Relax. delay: 2.000 sec  
Pulse: 45.0 degrees  
Acq. time: 1.734 sec  
Width: 9815.4 Hz  
8 repetitions  
OBSERVE: H1: 599.5671425 MHz  
PULPROG: zgpg30  
F2: 78.92328  
Total time: 0 min 30 sec

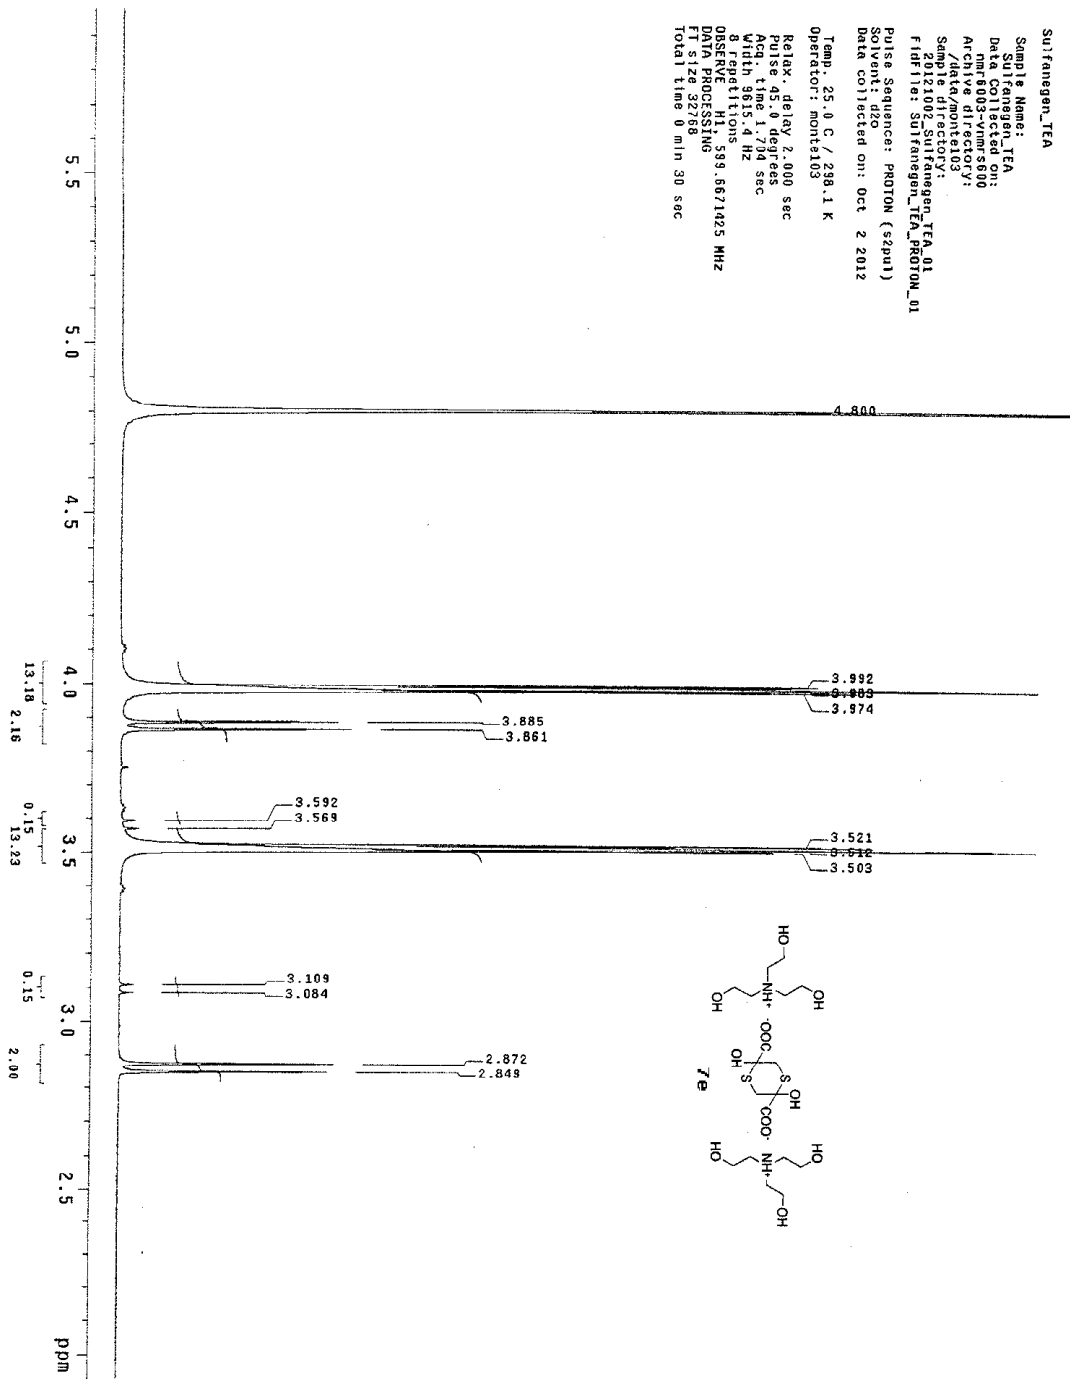



Sulfanagen\_TFA\_13C

Sample Name: Sulfanagen\_TFA\_13C  
Data Collected on: mmr6003-vmr6600  
Archive directory: /data/monte103

Sample ID: Sulfanagen\_TFA\_13C\_01  
Fidfiles: Sulfanagen\_TFA\_13C\_CARBON\_01

Pulse Sequence: CARBON (zgpg1)  
Solvent: cd3od  
Data collected on: Oct 2 2012

Temp: 25.0 C / 293.1 K  
Operator: monte103

Relax. delay: 2.000 sec  
Pulse: 45.0 degrees  
Acq. time: 0.885 sec  
Width: 37878.8 Hz  
G32: repetitions: 532  
OBSRV F1: 539.710821 MHz  
DECUPLE: 41.539.6710821 MHz  
Power: 36 db  
continuously on  
WALTZ-16 modulated  
DATA PROCESSING  
F1: 539.710821 MHz  
F2: 125.761360 MHz  
Time: 0.5 Hz  
Total time: 12 min

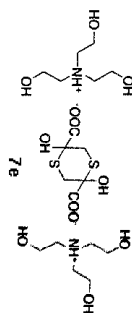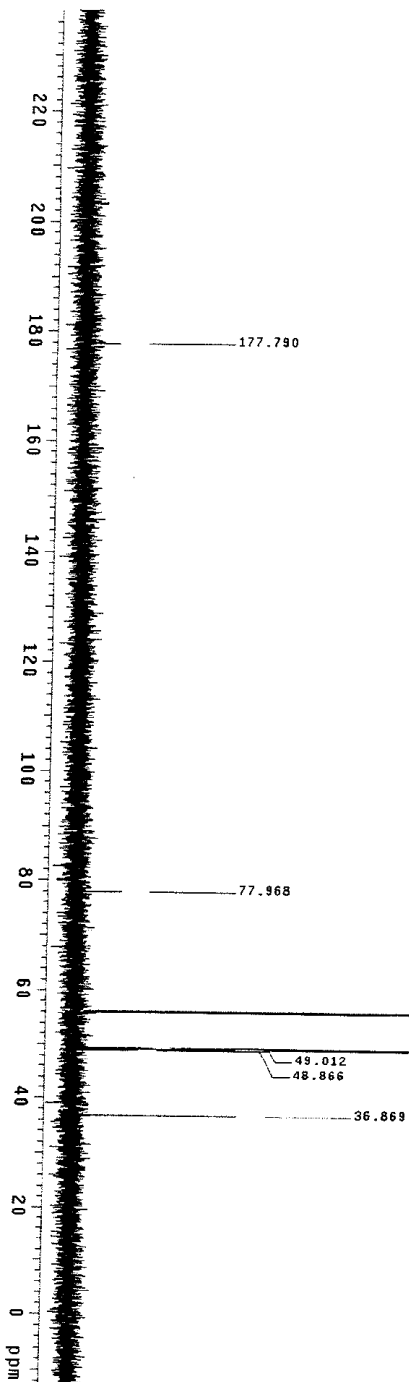



AM-12-457-Tr1s-13C

Sample Name: AM-12-457-Tr1s-13C  
Date: 12-03-2012 08:58:06  
Archive directory: /data/monte103  
Sample directory: /data/monte103  
File: 20121002\_AM-12-457-Tr1s-13C\_01  
File: AM-12-457-Tr1s-13C\_CARBON\_01  
Pulse Sequence: CARBON (zgpg3)  
Solvent: cd3od  
Data collected on: Oct 2 2012

Temp: 25.0 C / 298.1 K  
Operator: monte103  
Relax. delay: 2.000 sec  
Pulse: 45.0 degrees  
Acq. time: 0.885 sec  
Width: 37878.8 Hz  
512 repetitions  
OBSERVE: C13, 150.2663036 MHz  
DECOUPLE: H1, 593.8710621 MHz  
continuously on  
WALTZ-16 modulated  
DATA PROCESSING  
Line broadening: 0.5 Hz  
FT size: 65336  
Total time: 24 min

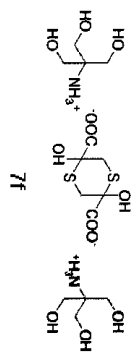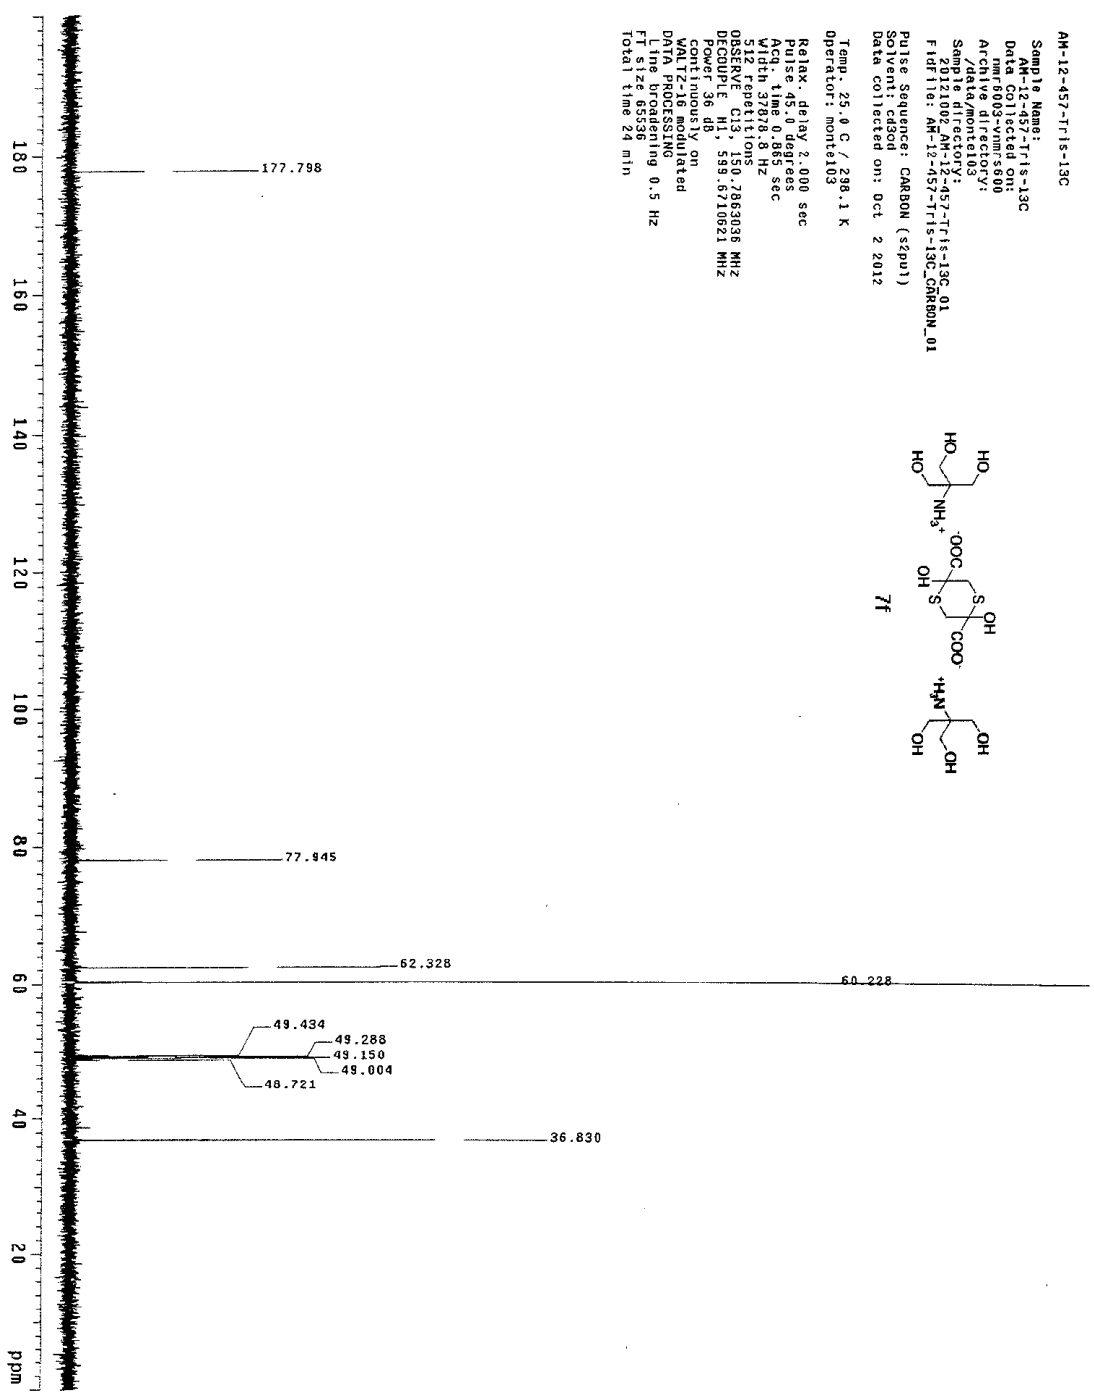

## NMR studies on Sulfanegen sodium (2)

### 1) At physiological pH in Phosphate buffer

Phosphate buffer was made up by mixing solutions of 0.1 M dipotassium deuterophosphate and 0.1 M potassium dideuterophosphate in D<sub>2</sub>O and adjusting the pD to 6.99 (pH 7.4). To ca 0.7 mL of this solution in an NMR tube was added 0.6 mg t-Butyl alcohol (0.008 mmole) as internal standard and 5.7 mg (0.032 mmole) Sodium mercaptopyruvate just before starting to run NMR spectra. This was run on a 200 MHz (Varian) autosampler machine.

| Time    | Percent exchanged |
|---------|-------------------|
| 0       | 0                 |
| 15 min  | 11%               |
| 30 min  | 19%               |
| 45 min  | 27%               |
| 70 min  | 34%               |
| 2 hrs   | 50%               |
| 3 ½ hrs | 67%               |

2) At pH ca 1.0

0.1M DCl (ca 0.7 mL ) was placed in an NMR tube to which was added 0.8 mg (0.01 mmole) t-Butyl alcohol (as internal standard) and 5.3 mg (0.030 mmole) Sodium mercaptopyruvate immediately before starting to run spectra. This was run on a 200 MHz autosampler spectrometer (Varian) This time the protons did not exchange over 4 d, but the isomer ratio changed dramatically as the less abundant isomer went from a trace up to about 30% with a half-life of ca 1 hour. At 19 d 75% of the protons were exchanged.

| Time   | % smaller isomer |
|--------|------------------|
| 0      | Trace            |
| 30 min | 12%              |
| 60 min | 15%              |
| 22 hrs | 26%              |
| 4 days | 30%              |



JTC XIV-103 NAME: J. A. ...  
 University of ...  
 Department of ...  
 VAC-200  
 Pulse Sequence: sput  
 Vessel: hemite  
 Sample: 1  
 Spin rate: 34  
 Spin rate: 11, 2008  
 Solvent: D2O  
 Piles: 1102  
 Starting time: 17:41:50  
 Completion time: 17:49:12  
 Total acq. time: 1 minute  
 UNITV-200 "vac200"  
 Ambient temperature  
 PULSE SEQUENCE  
 Pulse delay: 1.500 sec  
 Pulse: 1  
 Pulse: 45.0 degrees  
 Acq time: 2.000 sec  
 Width: 4002.4 Hz  
 16 repetitions  
 OBSERVE HI, 200.1214264 MHz  
 DATA PROCESSING  
 Line broadening: 0.1 Hz  
 FT size: 32768

Sulfanegen

At physiological pH (pD 6.99) in Phosphate buffer

Time = 2 hrs- 50% exchanged

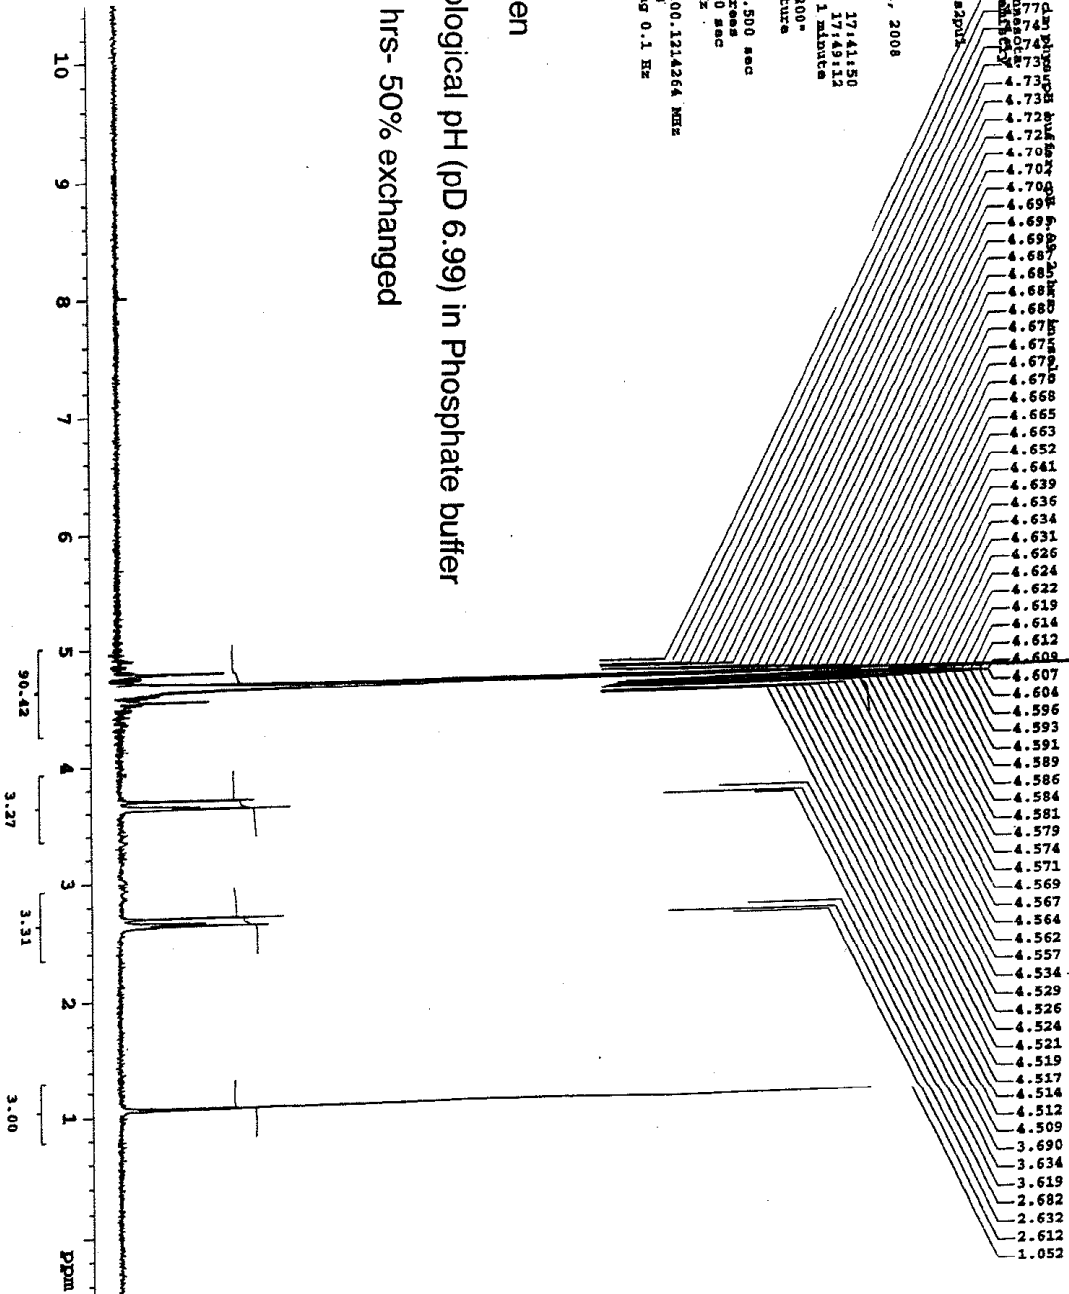

JTC XIV-103 NAME: 11, 2008  
 University of Minnesota  
 Department of Chemistry  
 VAC-200

Pulse Sequence: zgpg30  
 User: hndjfc  
 Sample: 1524  
 Spin rate: 24  
 Date: 11, 2008  
 Solvent: D2O  
 File: 1502  
 Starting time: 19:09:47  
 Completion time: 19:17:01  
 Total acq. time: 1 minute  
 UPRV-200 "vac200"  
 Ambient temperature

PULSE SEQUENCE  
 Relax: delay 1.500 sec  
 Pulse: 12.000 usec  
 Pulse: 12.000 usec  
 Width: 4002.4 Hz  
 16 repetitions

OBSERVE H1, 200.1214264 MHz  
 DATA PROCESSING  
 Line broadening 0.1 Hz  
 FT size 32768

Sulfanegen

At physiological pH (pD 6.99) in Phosphate buffer

Time = 3 1/2 hrs- 67% exchanged

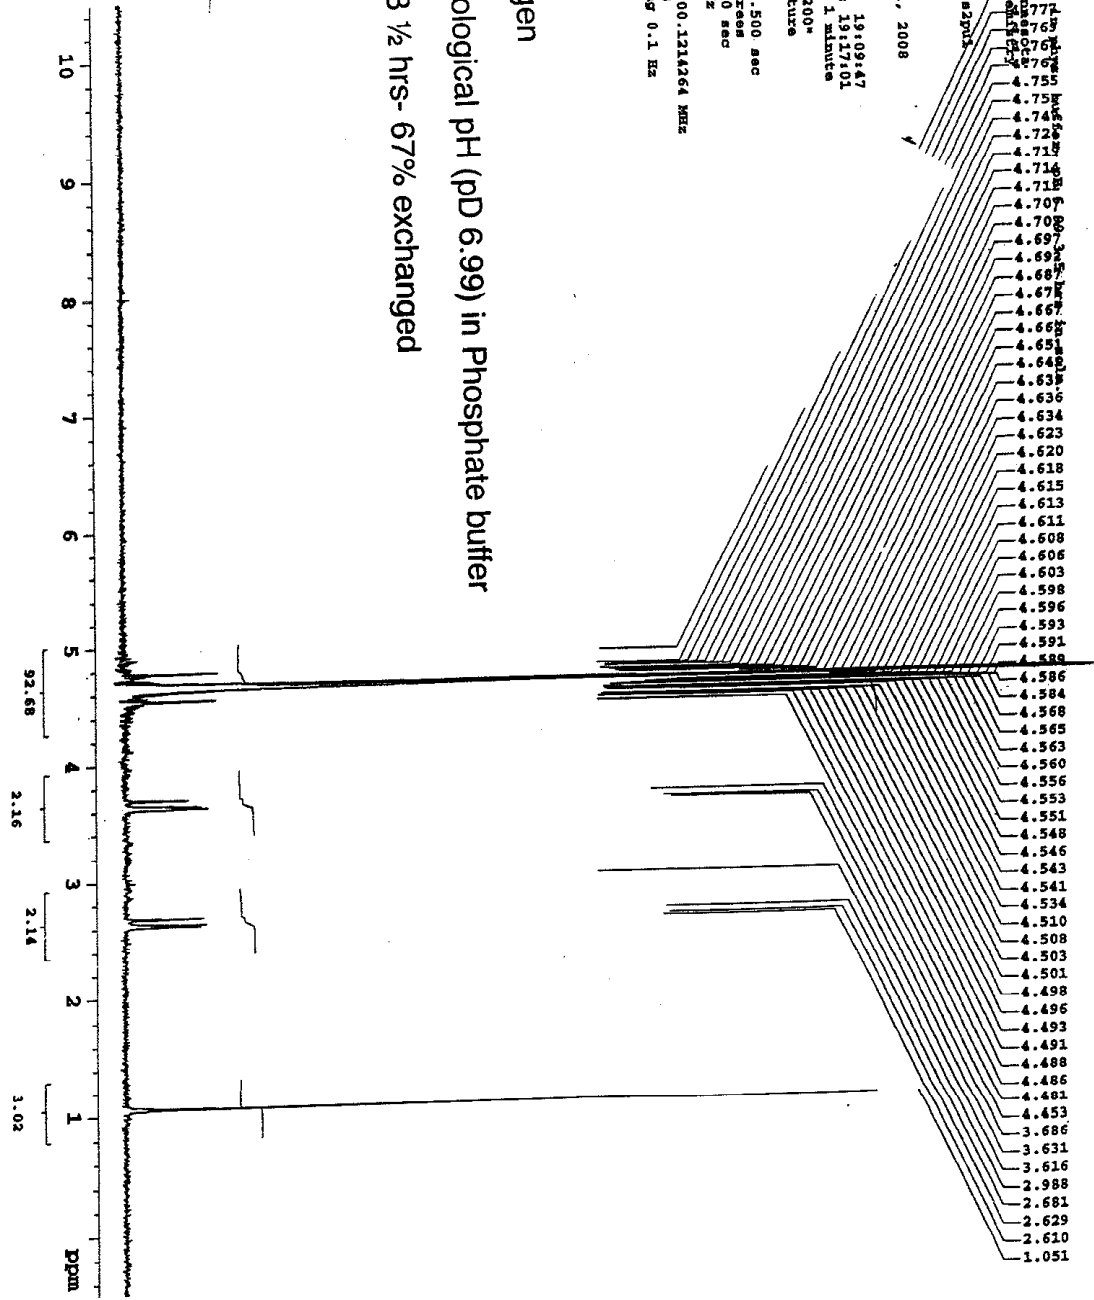



SFC XIV-103 NAME in 0.1 MDC1 PD 0.8 tlm = 0  
 University of Minnesota  
 Department of Chemistry  
 VMC-200  
 Pulse Sequence: s2pul  
 Name: Hnqfz  
 Sample: 13  
 Scan rate: 24 18, 2008  
 Data: 1302  
 Solvent: D2O  
 Pile: 1302  
 Starting time: 16:40:01  
 Completion time: 16:46:50  
 Total acq. time 1 minute  
 UNIT: 200 °vac200  
 Ambient temperature  
 PULSE SEQUENCE  
 P1: 4.500 sec  
 P2: 4.500 sec  
 Acq. time: 2.80 sec  
 Width: 4002.4 Hz  
 16 repetitions  
 OBSERVE HI, 200.1214264 MHz  
 DATA PROCESSING  
 Line broadening 0.1 Hz  
 FT size 32768

Sulfanegen  
 At PD ca 0.7 (pH ca 1.0)  
 Time = 0

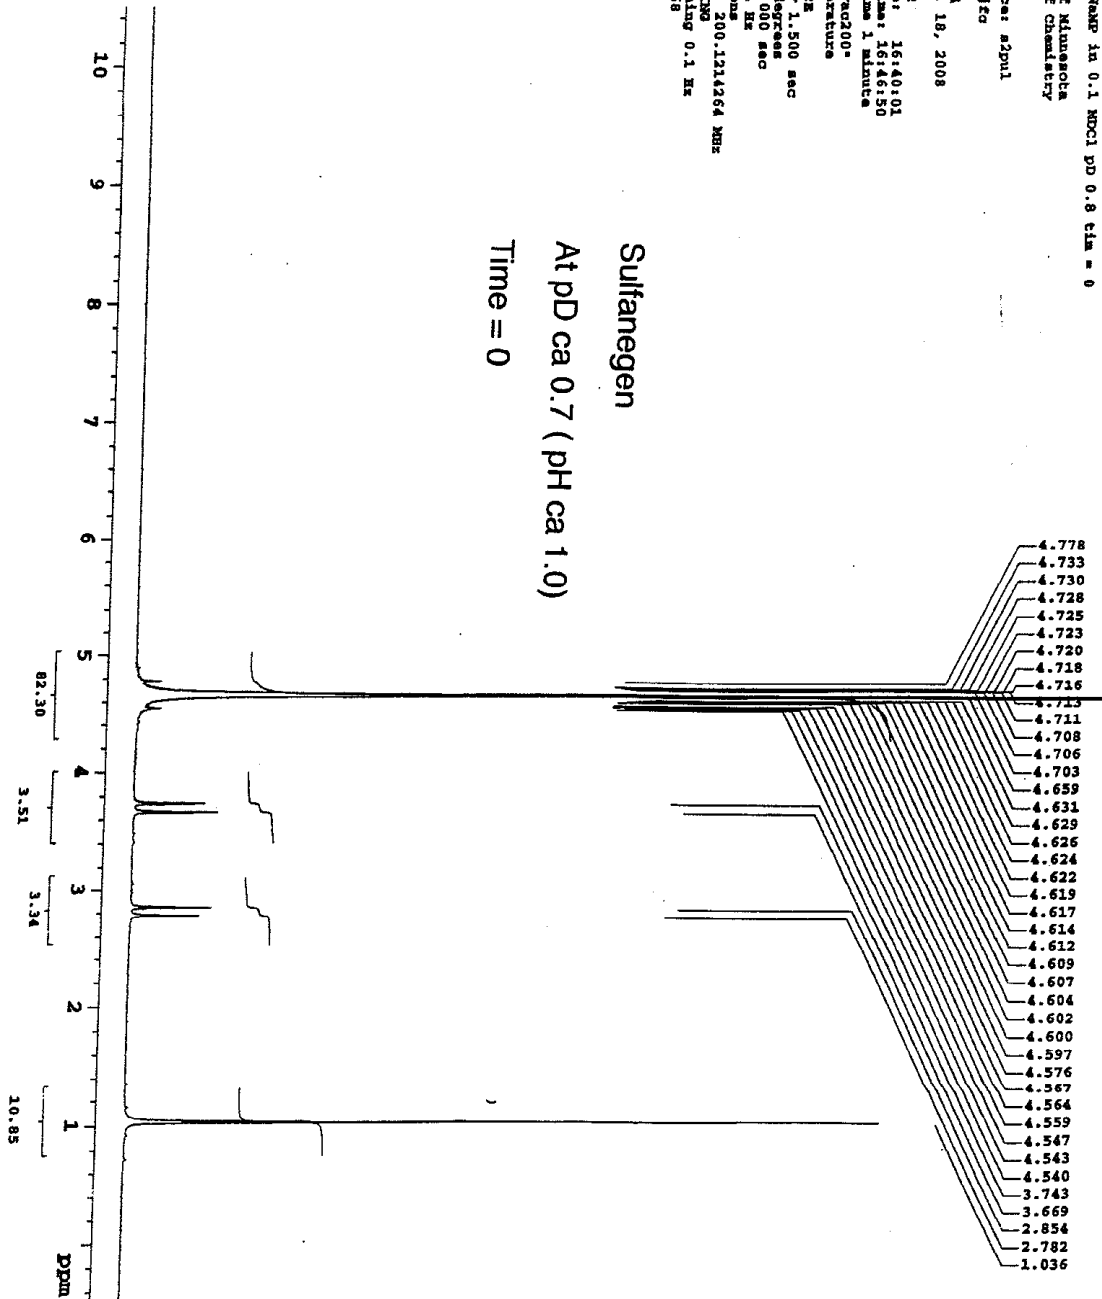

JPC XIV-103 NMR in 0.1 M DCl-D<sub>2</sub>O 0.8 time = 60 min  
 University of Minnesota  
 Department of Chemistry  
 VAC-200

Pulse Sequence: sput  
 User: hmfkc  
 Sample: 16  
 Split ratio: 23  
 Date: Sep. 18, 2008  
 Solvent: D2O  
 File: 1502  
 Starting time: 17:41:02  
 Completion time: 17:48:37  
 Total exp. time: 1 minute  
 UNITV-100 \*vac200  
 Ambient temperature  
 PULSE SEQUENCE  
 Relax. delay: 1.500 sec  
 Pulse: 45.0 degree  
 Acq. time: 2.000 sec  
 Width: 4002.4 Hz  
 16 repetitions  
 OBSERVED FREQUENCY: 200.1214264 MHz  
 OBSERVED PROCESSED  
 File broadening: 0.1 Hz  
 FT file: 32768

Sulfanegen  
 At pH 0.7 (pH ca 1.0)  
 time = 60 min - no exchange  
 but 15% less abundant isomer

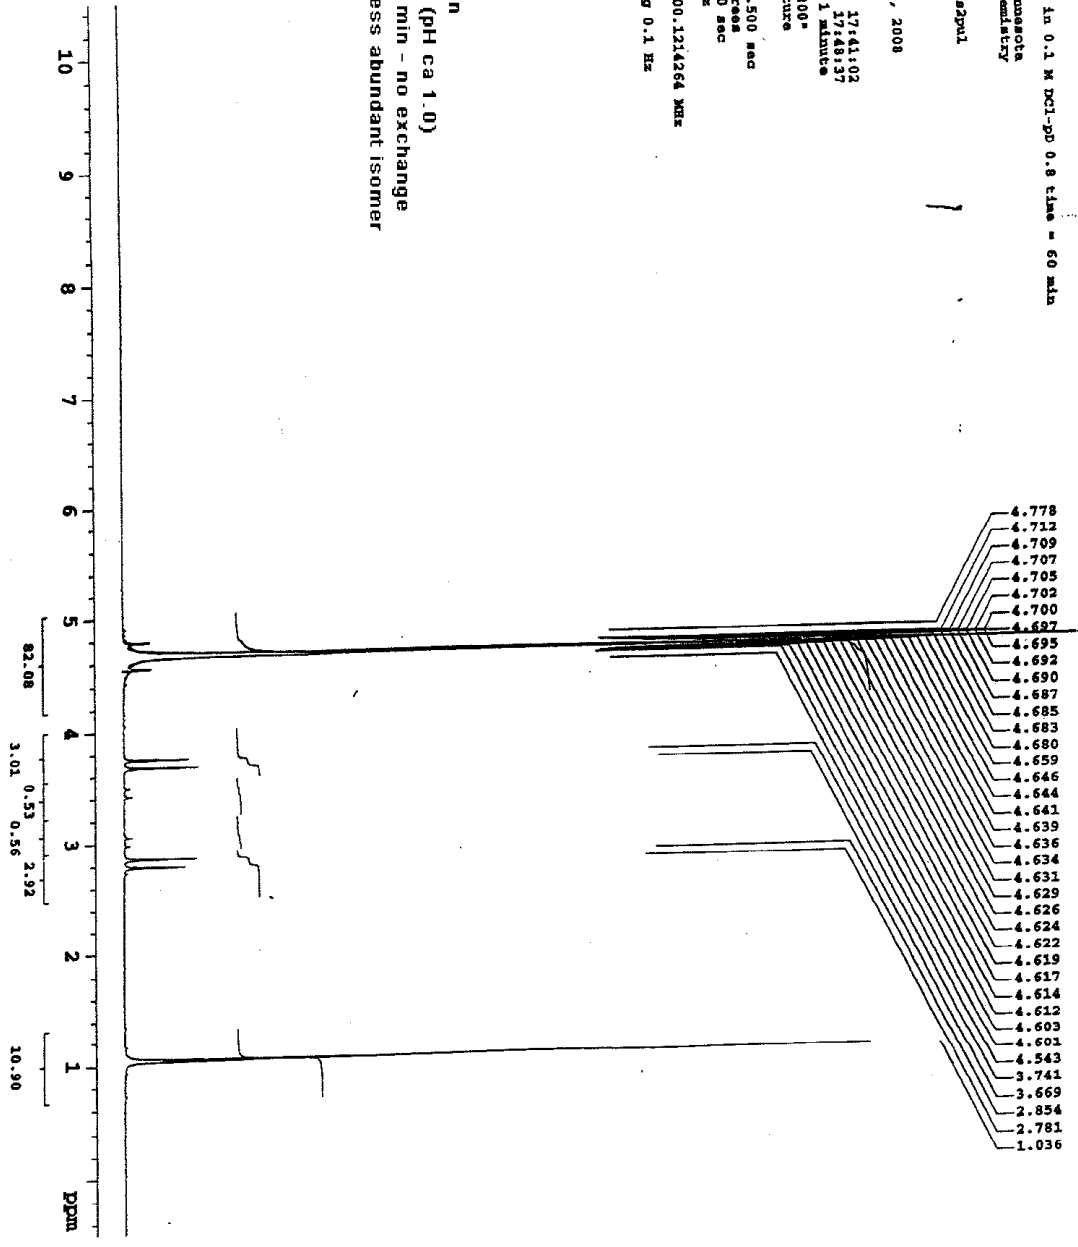

JPC XIV-103 NMR 14.414  
 University of Michigan  
 Department of Chemistry  
 VAC-200

Pulse Sequence: sput

Unit: Hz  
 Sample: 10  
 Spin rate: 24  
 Date: Sep. 22, 2008  
 Solvent: D2O  
 File: 1902  
 Starting time: 19:43:17  
 Completion time: 19:50:15  
 Total acq. time: 1 minute  
 UNIT-200 "vac200"  
 Ambient temperature

PULSE PROGRAM  
 Relax. delay 1.500 sec  
 Pulse 45.0 degrees  
 Acq. time 2.000 sec  
 Width 4002.4 Hz  
 16 repetitions

OBSERVE HI, 200.1214264 MHz  
 DATA PROCESSING  
 Line broadening 0.1 Hz  
 FT size 3768

4.768  
4.767  
4.766  
4.765  
4.755  
4.754  
4.753  
4.747  
4.745  
4.739  
4.738  
4.736  
4.729  
4.727  
4.724  
4.722  
4.719  
4.714  
4.712  
4.709  
4.707  
4.705  
4.702  
4.700  
4.697  
4.695  
4.692  
4.684  
4.681  
4.679  
4.676  
4.674  
4.672  
4.669  
4.662  
4.658  
4.651  
4.648  
4.646  
4.644  
4.641  
4.639  
4.635  
4.620  
4.628  
4.625  
4.623  
4.620  
4.618  
4.615  
4.613  
4.611  
4.608  
4.606  
4.603  
4.601  
4.598  
4.596  
4.593  
4.543  
4.540  
3.735  
3.663  
2.847  
2.775  
1.032  
1.029

Sulfanegen  
 Time = 4 d - still no exchange  
 but 30% less abundant isomer

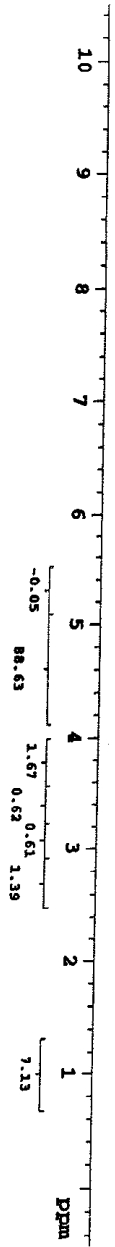

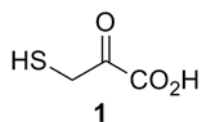

**Figure 1.** 3-Mercaptopyruvic acid (3-MP), the endogenous substrate for 3-MST

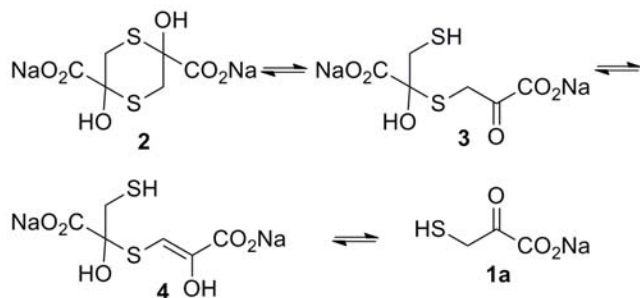

**Figure 2.** Chemical equilibria of dithiane **2**

**Scheme 1. Synthesis of sulfanegen salts 7a-f**

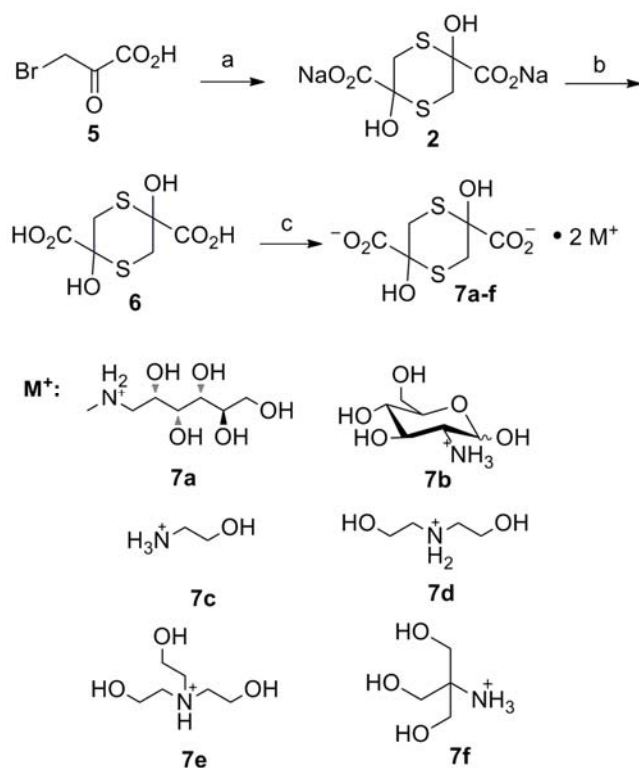

<sup>a</sup>Reagents and conditions: (a) 2 molar equivalents NaHS, ethanol, 0 °C; (b) Dowex-50WX8, H<sup>+</sup> form, 7 equivalents; (c) 2 equivalents of a biocompatible amine (M).
